# Supplementary material for: Directed studies towards the total synthesis of (+)-13-deoxytedanolide: simple and convenient synthesis of the C8–C16 fragment
Source: Royal Society of Chemistry journal article supplement (doi:10.1039/c3ob40674a), 2013-01-01

Supporting Information

## **Directed Studies Towards The Total Synthesis of (+)-13-Deoxytedanolide: Simple and Convenient Synthesis of C8-C16 fragment**

**Sébastien Meiries, Alexandra Bartoli, Mélanie Decostanzi, Jean-Luc Parrain\* and  
Laurent Commeiras\***

*Aix Marseille Université, CNRS, iSm2 UMR 7313,*

*13397 Marseille cedex 20, France*

E-mail: [jl.parrain@univ-amu.fr](mailto:jl.parrain@univ-amu.fr); [laurent.commeiras@univ-amu.fr](mailto:laurent.commeiras@univ-amu.fr)

### **Table of Contents**

|        |                                                                                                                       |
|--------|-----------------------------------------------------------------------------------------------------------------------|
| S2     | General experimental details                                                                                          |
| S3-S32 | Experimental section and characterisation data, $^1\text{H}$ NMR and $^{13}\text{C}$ NMR spectra<br>for each compound |

## Supporting Information

### *Usual procedures*

All reagents were obtained from commercial sources and used as supplied unless otherwise stated. Anhydrous THF, Et<sub>2</sub>O, Toluene and CH<sub>2</sub>Cl<sub>2</sub> were obtained from a MBraun<sup>®</sup> SPS-800 solvent purification system. Light petroleum refers to the fraction of petrol ether that was distilled between 40 °C and 65 °C.

The reactions were magnetically stirred and monitored by TLC, which were performed on Merck<sup>®</sup> 60F254 plates and achieved under a 254 nm UV light, visualized with an aqueous solution of potassium permanganate or an ethanolic solution of molybdophosphoric acid, followed by treatment with a heat gun.

Flash chromatography was performed with Merck<sup>®</sup> Kieselgel 60 (230-400) mesh silica gel.

### *Physical data and spectroscopic measurements*

NMR data were recorded on a Bruker Avance 300 and 400 spectrometer in C<sub>6</sub>D<sub>6</sub> or CDCl<sub>3</sub> and chemical shifts ( $\delta$ ) were given in ppm relative to the residual non-deuterated solvent signal for <sup>1</sup>H NMR (C<sub>6</sub>D<sub>6</sub>: 7.16 ppm), (CDCl<sub>3</sub>: 7.26 ppm) and relative to the deuterated solvent signal for <sup>13</sup>C NMR (C<sub>6</sub>D<sub>6</sub>: 128.06 ppm), (CDCl<sub>3</sub>: 77.16 ppm); coupling constants (*J*) are in Hertz, and the classical abbreviations are used to describe the signal multiplicity (s = singlet, d = doublet, t = triplet, sept = septet, m = multiplet, dd = doublet of doublets, dt = doublets of triplets, br = broad, etc.). NMR Spectra were assigned using information ascertained from DEPT, HMQC and NOE experiments.

High resolution mass spectra (HRMS) have been performed using a mass spectrometer equipped with pneumatically assisted atmospheric pressure ionization. The sample was ionized in positive mode electrospray in the following conditions: electrospray voltage (ISV): 5500 V; orifice voltage (OR): 70 V; nebulising gas flow pressure (air): 0.6 psi. The mass spectrum was obtained using a time of flight analyzer (TOF). The measure was realized in triplicate. The sample was dissolved in methanol (500  $\mu$ L) then diluted (dilution factor 4/10000) in a methanolic solution of ammonium acetate (3 mM). The sample solution was infused in the ionization source at a 5  $\mu$ L/min flow rate.

## Supporting Information

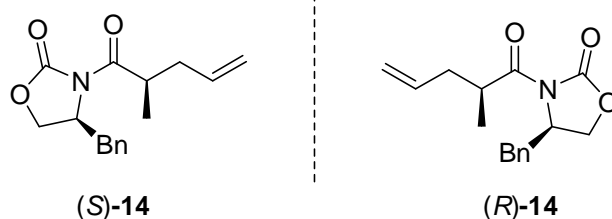

$^1\text{H NMR}$  (300 MHz,  $\text{CDCl}_3$ )  $\delta$  1.18 (3H, d,  $J = 6.8$  Hz,  $\text{CH}_3$ ), 2.19-2.28 (1H, m,  $\text{CH}_2$ ), 2.48-2.57 (1H, m,  $\text{CH}_2$ ), 2.69 (1H, dd,  $J = 13.4$  and  $9.8$  Hz,  $\text{CH}_2$ ), 3.27 (1H, dd,  $J = 13.4$  and  $3.2$  Hz,  $\text{CH}_2$ ), 3.36 (1H, m,  $J = 6.8$  Hz,  $\text{CH}$ ), 4.11-4.21 (2H, m,  $\text{CH}_2$ ), 4.64-4.71 (1H, m,  $\text{CH}$ ), 5.04-5.13 (2H, m,  $\text{CH}_2$ ), 5.76-5.89 (m, 1H,  $\text{CH}$ ), 7.20-7.35 (5H, m,  $\text{CH}_{\text{Ar}}$ );  $^{13}\text{C NMR}$  ( $\text{CDCl}_3$ , 75 MHz)  $\delta$  16.5 ( $\text{CH}_3$ ), 37.2 ( $\text{CH}$ ), 38.0 ( $\text{CH}_2$ ), 38.1 ( $\text{CH}_2$ ), 55.4 ( $\text{CH}$ ), 66.1 ( $\text{CH}_2$ ), 117.3 ( $\text{CH}_2$ ), 127.4 ( $\text{CH}_{\text{Ar}}$ ), 129.0 (2 x  $\text{CH}_{\text{Ar}}$ ), 129.5 (2 x  $\text{CH}_{\text{Ar}}$ ), 135.4 ( $\text{CH}$ ), 135.5 ( $\text{C}_{\text{Ar}}$ ), 153.2 ( $\text{C}$ ), 176.6 ( $\text{C}$ ); (S)-14  $[\alpha]_{\text{D}}^{19} = +38.0$  ( $c$  1,  $\text{CHCl}_3$ ); (R)-14  $[\alpha]_{\text{D}}^{19} = -39.0$  ( $c$  1,  $\text{CHCl}_3$ )

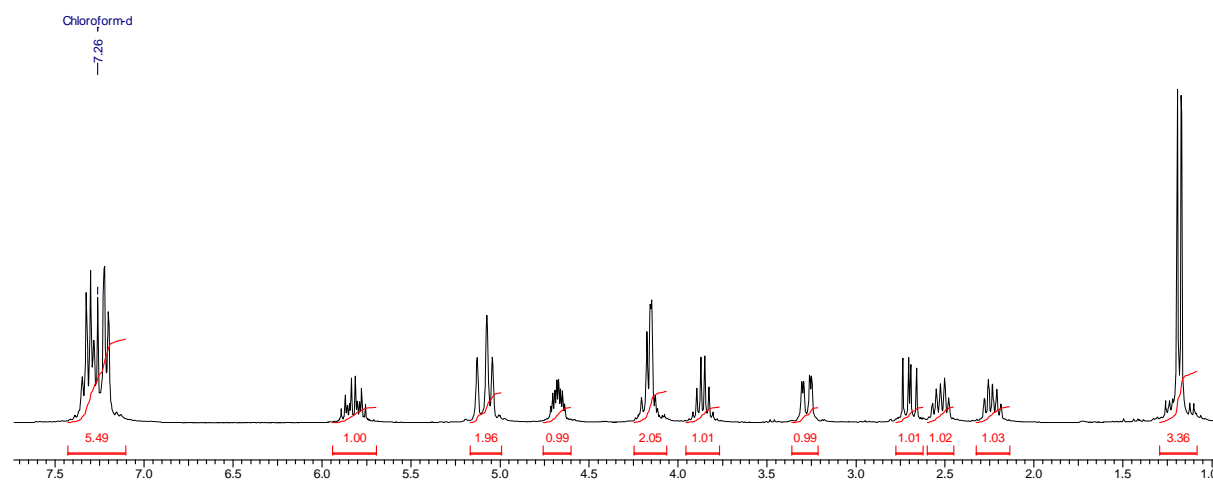

## Supporting Information

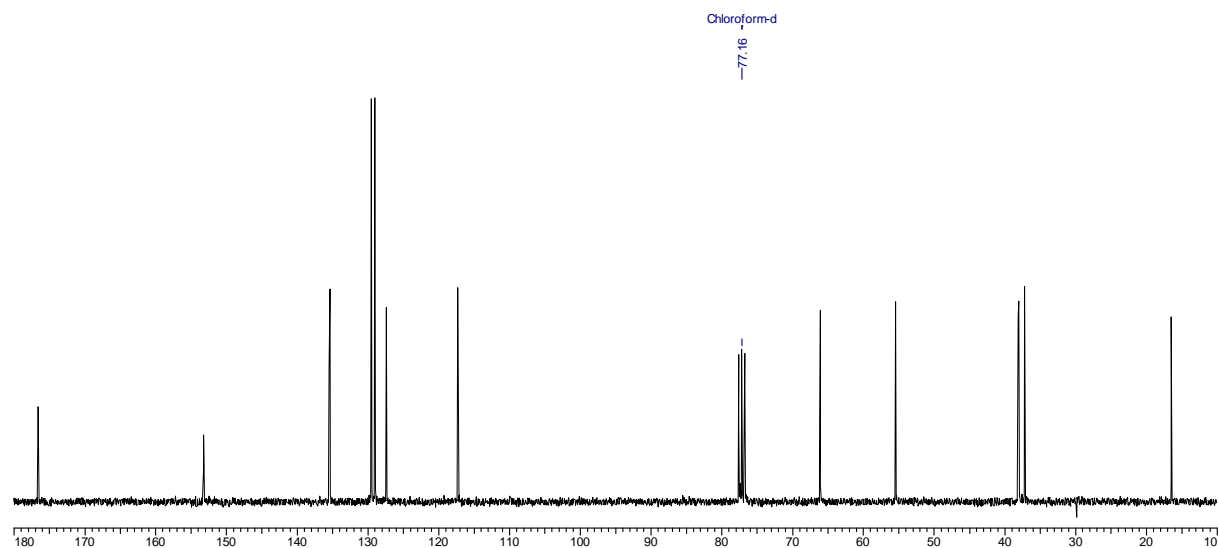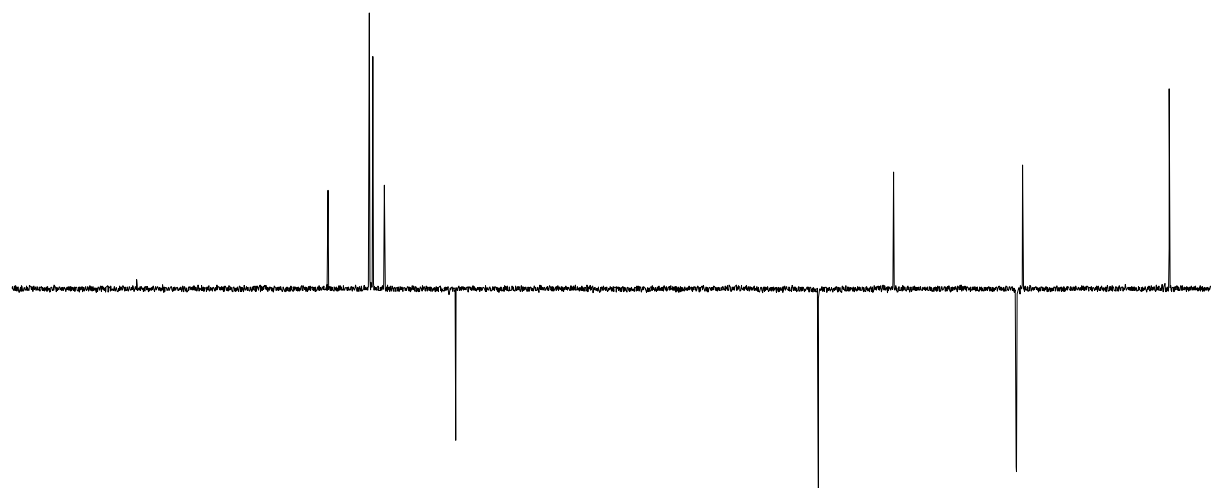

## Supporting Information

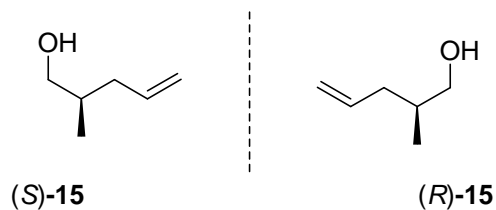

$^1\text{H NMR}$  (200 MHz,  $\text{CDCl}_3$ )  $\delta$  0.92 (3H, d,  $J = 6.7$  Hz,  $\text{CH}_3$ ), 1.37 (1H, br s, OH), 1.65-1.82 (1H, m, CH), 1.87-2.01 (1H, m,  $\text{CH}_2$ ), 2.11-2.25 (1H, m,  $\text{CH}_2$ ), 3.40-3.55 (2H, m,  $\text{CH}_2$ ), 4.99-5.09 (2H, m,  $\text{CH}_2$ ), 5.71-5.92 (m, 1H, CH),  $^{13}\text{C NMR}$  (50 MHz,  $\text{CDCl}_3$ )  $\delta$  16.4 ( $\text{CH}_3$ ), 35.6 (CH), 37.9 ( $\text{CH}_2$ ), 67.7 ( $\text{CH}_2$ ), 116.1 ( $\text{CH}_2$ ), 137.1 (CH); (R)-15  $[\alpha]_{\text{D}}^{19} = +4.3$  (c 1,  $\text{CHCl}_3$ ); (S)-15  $[\alpha]_{\text{D}}^{24} = -2.6$  (c 1,  $\text{CHCl}_3$ )

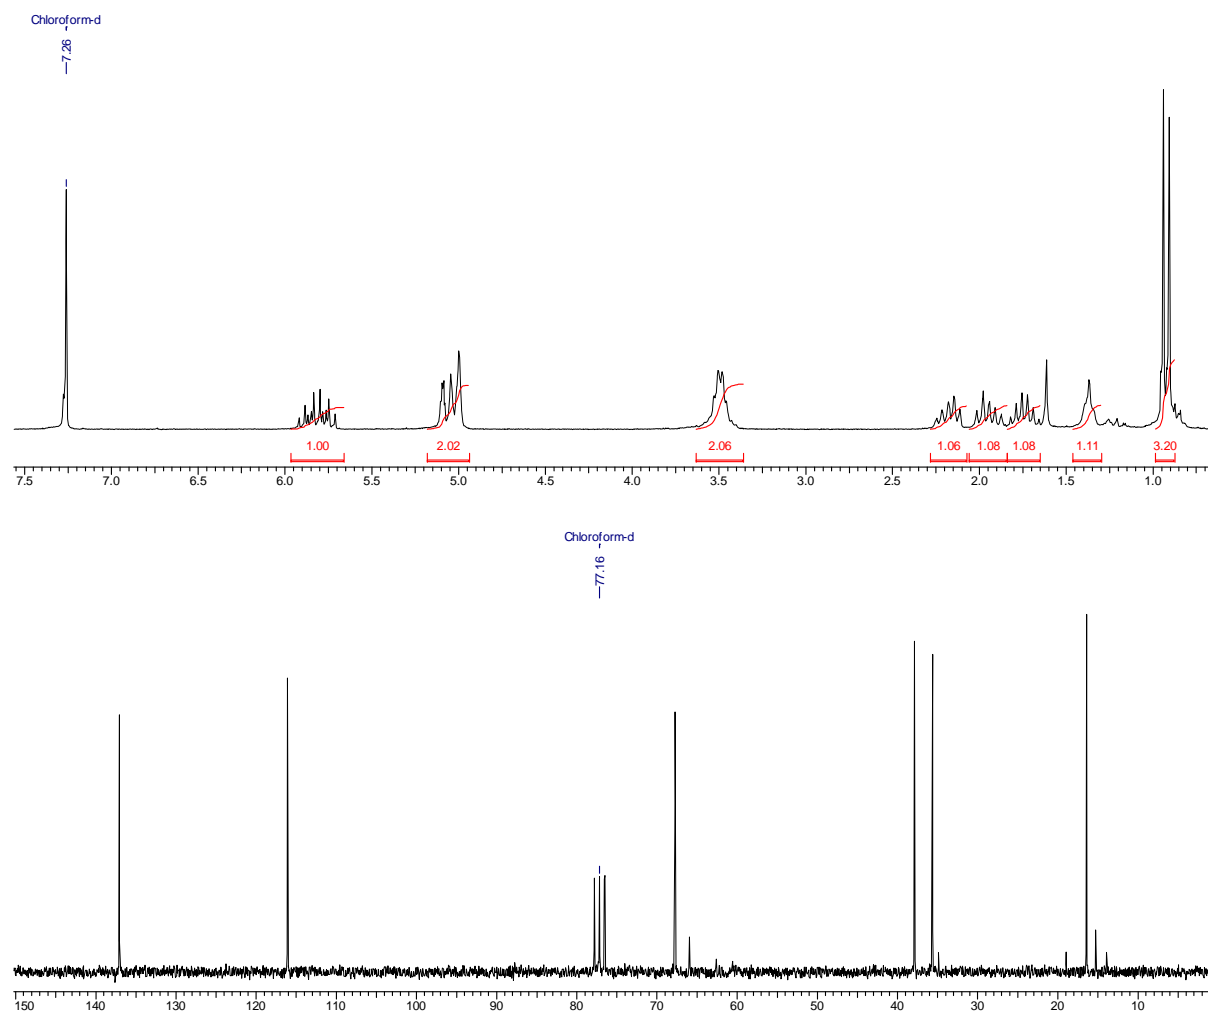

## Supporting Information

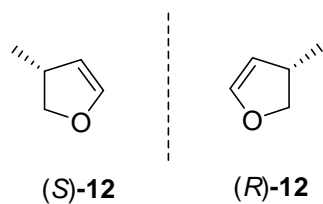

**<sup>1</sup>H NMR** (400 MHz, CDCl<sub>3</sub>)  $\delta$  1.07 (3H, d,  $J = 6.8$  Hz, CH<sub>3</sub>), 2.98-3.07 (1H, m, CH), 3.85 (1H, dd,  $J = 8.8$  and 6.8 Hz, CH<sub>2</sub>), 4.37 (1H, dd,  $J = 9.8$  and 8.8 Hz, CH<sub>2</sub>), 4.93 (1H, t,  $J = 2.5$  Hz, CH), 6.29 (1H, t,  $J = 2.5$  Hz, CH); **<sup>13</sup>C NMR** (50 MHz, CDCl<sub>3</sub>)  $\delta$  20.6 (CH<sub>3</sub>), 36.5 (CH), 76.7 (CH<sub>2</sub>), 106.3 (CH), 145.2 (CH).

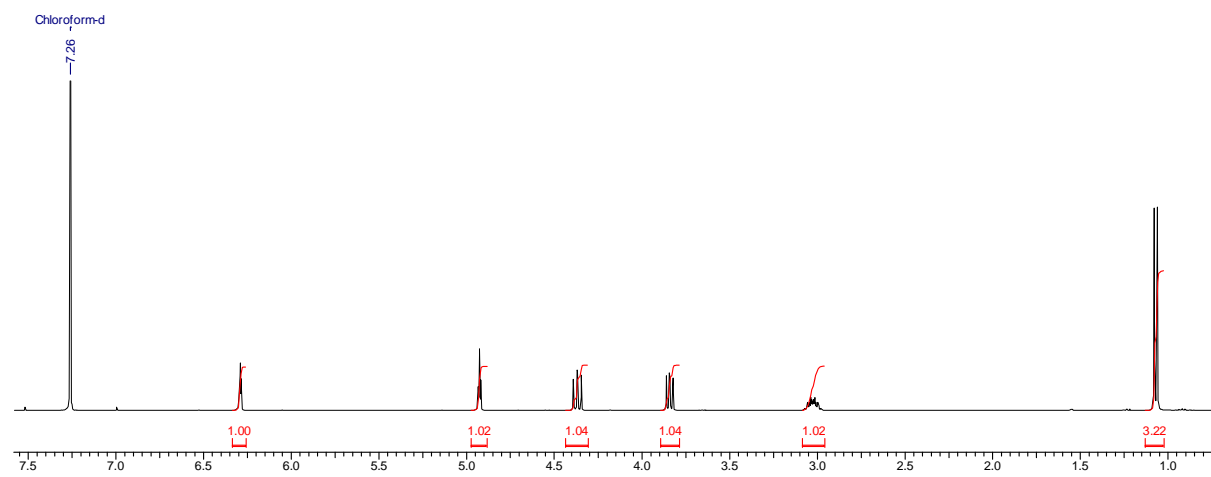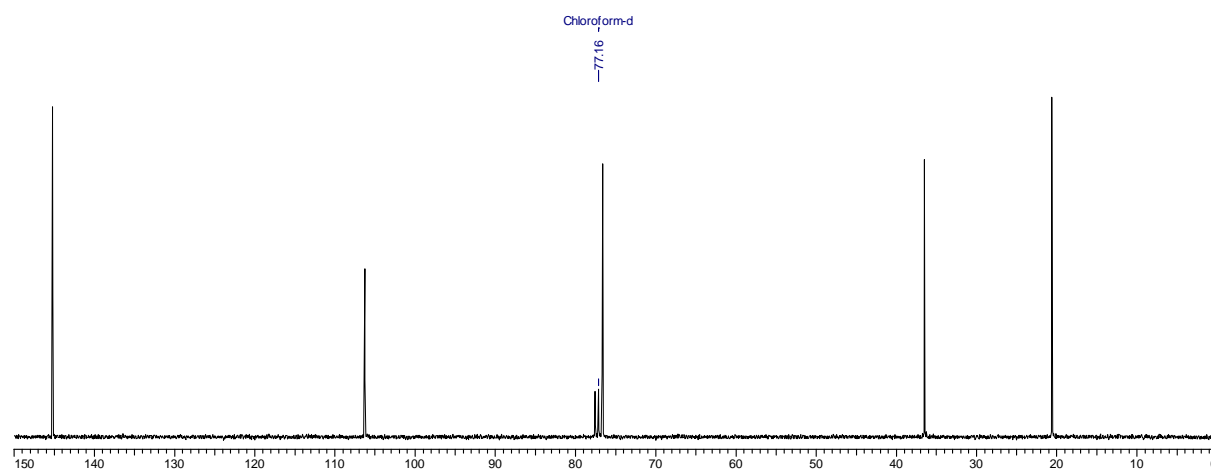

## Supporting Information

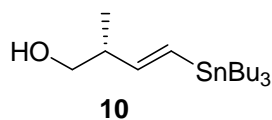

$[\alpha]_D^{24} +21.4$ , (*c* 1.0,  $\text{CHCl}_3$ );  $^1\text{H NMR}$  (400 MHz,  $\text{CDCl}_3$ )  $\delta$  0.84-0.90 (15H, m, 3 x  $\text{CH}_3$  and 3 x  $\text{CH}_2$ ), 1.02 (3H, d,  $J = 6.8$  Hz,  $\text{CH}_3$ ), 1.24-1.53 (12H, m, 6 x  $\text{CH}_2$ ), 2.34-2.44 (1H, m,  $\text{CH}$ ), 3.38-3.44 (1H, m,  $\text{CH}_2$ ), 3.47-3.53 (1H, m,  $\text{CH}_2$ ), 5.79 (1H, dd,  $J = 19.0$  and 7.0 Hz,  $^3J_{\text{Sn-H}} = 70$  Hz,  $\text{CH}$ ), 5.99 (1H, br d,  $J = 19.0$  Hz,  $^2J_{\text{Sn-H}} = 18$  Hz,  $\text{CH}$ );  $^{13}\text{C NMR}$  (75 MHz,  $\text{CDCl}_3$ )  $\delta$  9.5 (3 x  $\text{CH}_2$ ,  $^1J_{\text{Sn-C}} = 334$  Hz), 13.4 (3 x  $\text{CH}_3$ ), 16.1 ( $\text{CH}_3$ ), 27.3 (3 x  $\text{CH}_2$ ,  $^3J_{\text{Sn-C}} = 54$  Hz), 29.2 (3 x  $\text{CH}_2$ ,  $^2J_{\text{Sn-C}} = 21$  Hz), 44.5 ( $\text{CH}$ ,  $^3J_{\text{Sn-C}} = 57$  Hz), 66.9 ( $\text{CH}_2$ ), 129.5 ( $\text{C}_3$ ,  $\text{CH}$ ,  $^2J_{\text{Sn-C}} = 23$  Hz), 151.2 ( $\text{CH}$ ); **IR** (thin film)  $\nu_{\text{max}} = 3325, 2956, 2923, 2871, 2852, 1597, 1455, 1376, 1072, 1031, 990$   $\text{cm}^{-1}$ ; **LRMS**  $m/z$  (ESI) 399.( $\text{M}+\text{Na}$ ) $^+$ ; **HRMS**  $m/z$  (ESI) calcd for  $\text{C}_{17}\text{H}_{37}\text{OSn}$  [ $\text{M}+\text{H}$ ] $^+$ : 377.1860, found 377.1861.

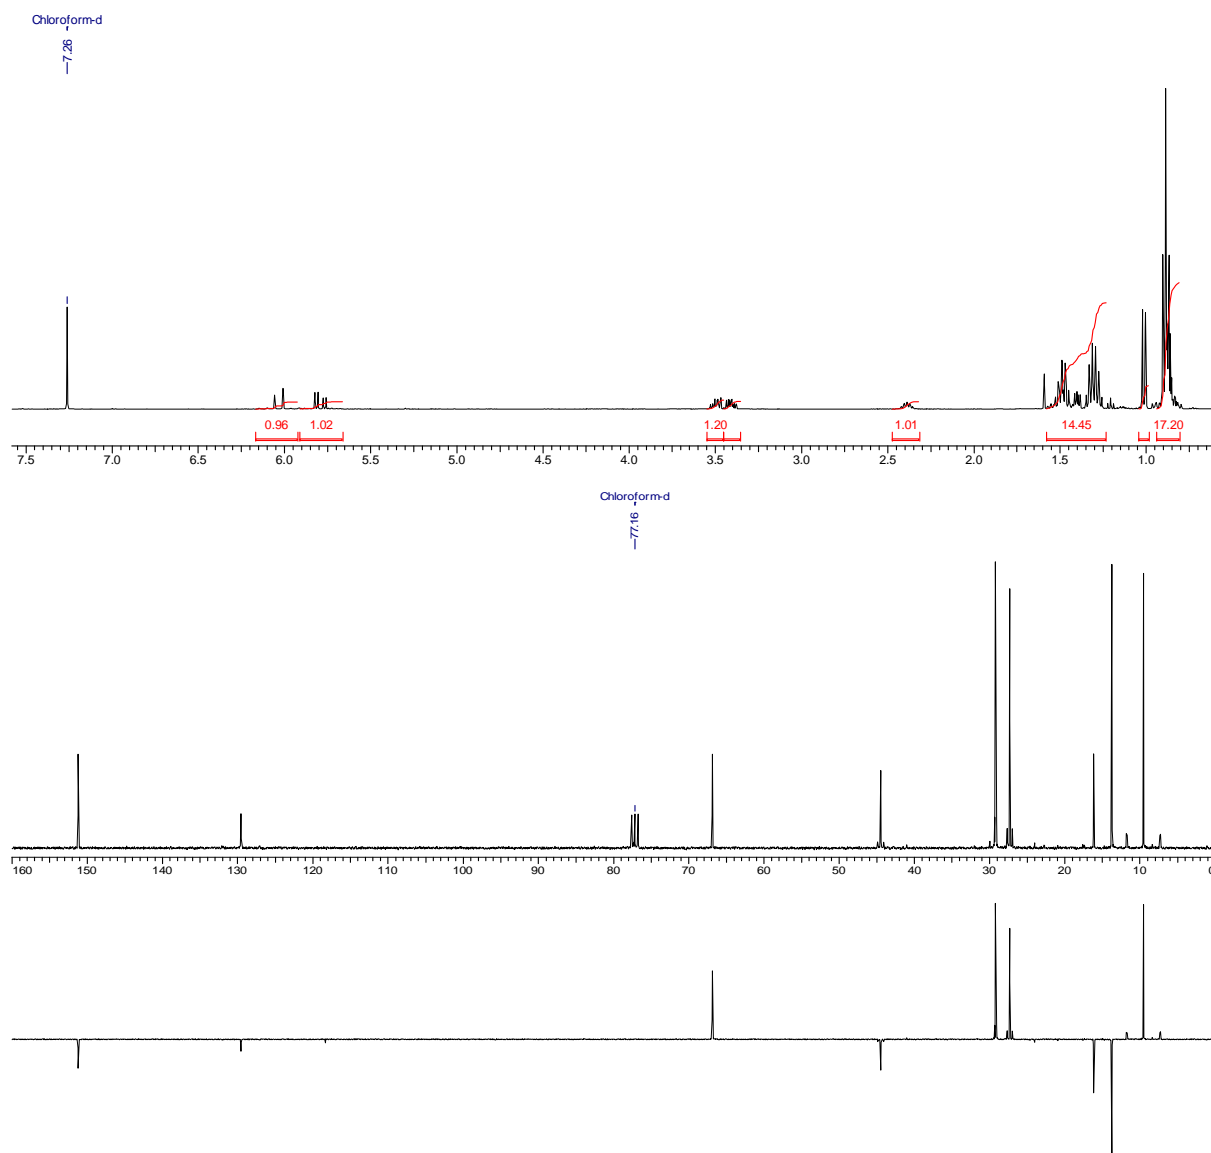

## Supporting Information

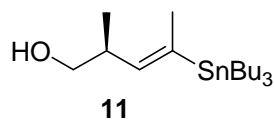

$[\alpha]_D^{21}$  -31.8 (*c* 1.0,  $\text{CHCl}_3$ );  $^1\text{H NMR}$  (400 MHz,  $\text{CDCl}_3$ )  $\delta$  0.84-0.98 (18H, 4 x  $\text{CH}_3$  and 3 x  $\text{CH}_2$ ), 1.16-1.56 (12H, m, 6 x  $\text{CH}_2$ ), 1.88 (3H, d,  $J = 1.9$  Hz,  $^3J_{\text{Sn-H}} = 44\text{Hz}$ ,  $\text{CH}_3$ ), 2.77-2.99 (1H, m,  $\text{CH}$ ), 3.30-3.36 (1H, m,  $\text{CH}_2$ ), 3.43-3.50 (1H, m,  $\text{CH}_2$ ), 5.23 (1H, dq,  $J = 9.0$  and 1.9 Hz,  $^3J_{\text{Sn-H}} = 70$  Hz,  $\text{CH}$ );  $^{13}\text{C NMR}$  (75 MHz,  $\text{CDCl}_3$ )  $\delta$  9.3 (3 x  $\text{CH}_2$ ,  $^1J_{\text{Sn-C}} = 322$  Hz), 13.8 (3 x  $\text{CH}_3$ ), 16.9 ( $\text{CH}_3$ ), 19.7 ( $\text{CH}_3$ ), 27.5 (C9, 3 x  $\text{CH}_2$ ,  $^3J_{\text{Sn-C}} = 54$  Hz), 29.3 (3 x  $\text{CH}_2$ ,  $^2J_{\text{Sn-C}} = 20$  Hz), 35.3 ( $\text{CH}_3$ ,  $^3J_{\text{Sn-C}} = 53$  Hz), 67.7 ( $\text{CH}_2$ ), 141.2 (C), 143.1 ( $\text{CH}$ ,  $^2J_{\text{Sn-C}} = 24$  Hz); **IR** (thin film)  $\nu_{\text{max}} = 3330, 2955, 2924, 2871, 2850, 1456, 1377, 1071, 1030, 970$   $\text{cm}^{-1}$ ; **HRMS** (ESI)  $m/z$  calcd for  $\text{C}_{18}\text{H}_{39}\text{OSn}$   $[\text{M}+\text{H}]^+$ : 391.2017, found 391.2017.

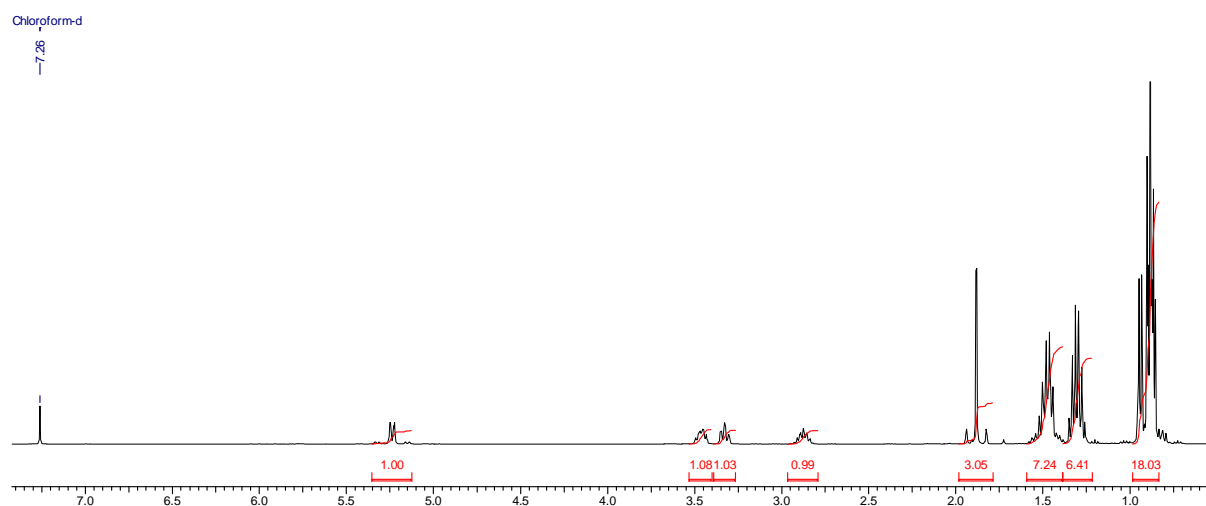



## Supporting Information

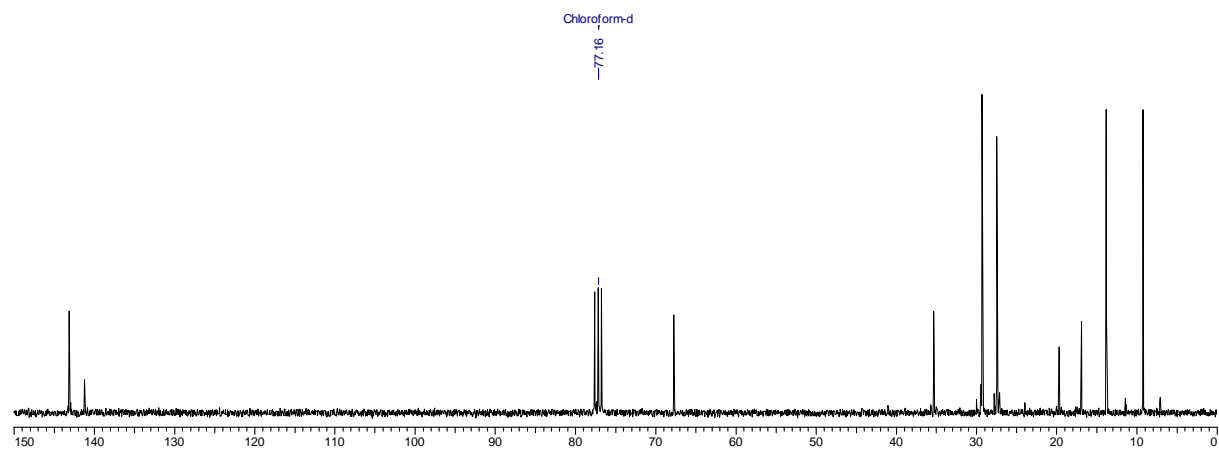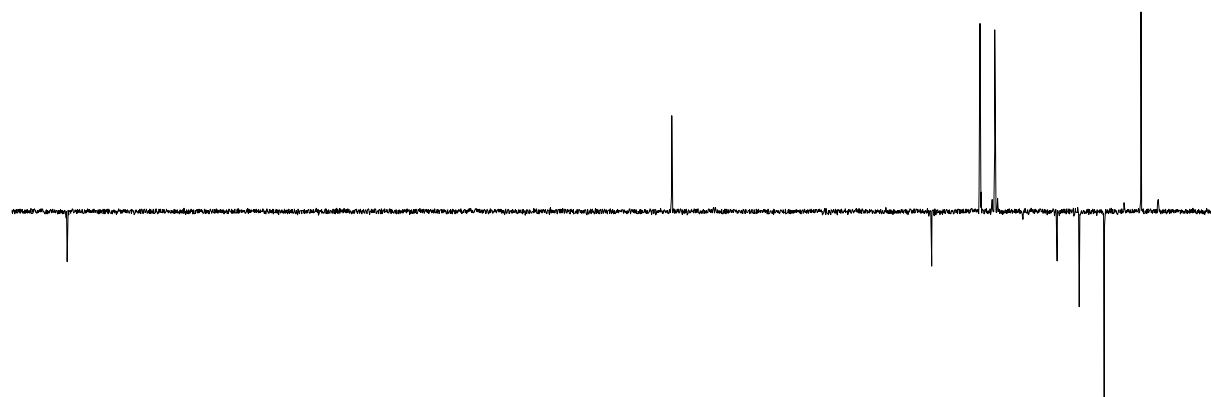

## Supporting Information

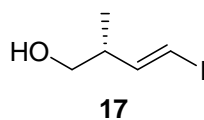

$[\alpha]_D^{25} +23.1$ , (*c* 1.0,  $\text{CHCl}_3$ );  $^1\text{H NMR}$  (300 MHz,  $\text{CDCl}_3$ )  $\delta$  1.00 (3H, d,  $J = 6.8$  Hz,  $\text{CH}_3$ ), 1.88-1.92 (1H, m, OH), 2.33-2.46 (1H, m, CH), 3.40-3.53 (2H, m,  $\text{CH}_2$ ), 6.12 (1H, d,  $J = 14.5$  Hz, CH), 6.45 (1H, dd,  $J = 14.5$  and 7.9 Hz, CH);  $^{13}\text{C NMR}$  (75 MHz,  $\text{CDCl}_3$ )  $\delta$  15.6 ( $\text{CH}_3$ ), 43.4 (CH), 66.5 ( $\text{CH}_2$ ), 76.2 (CH), 148.6 (CH).

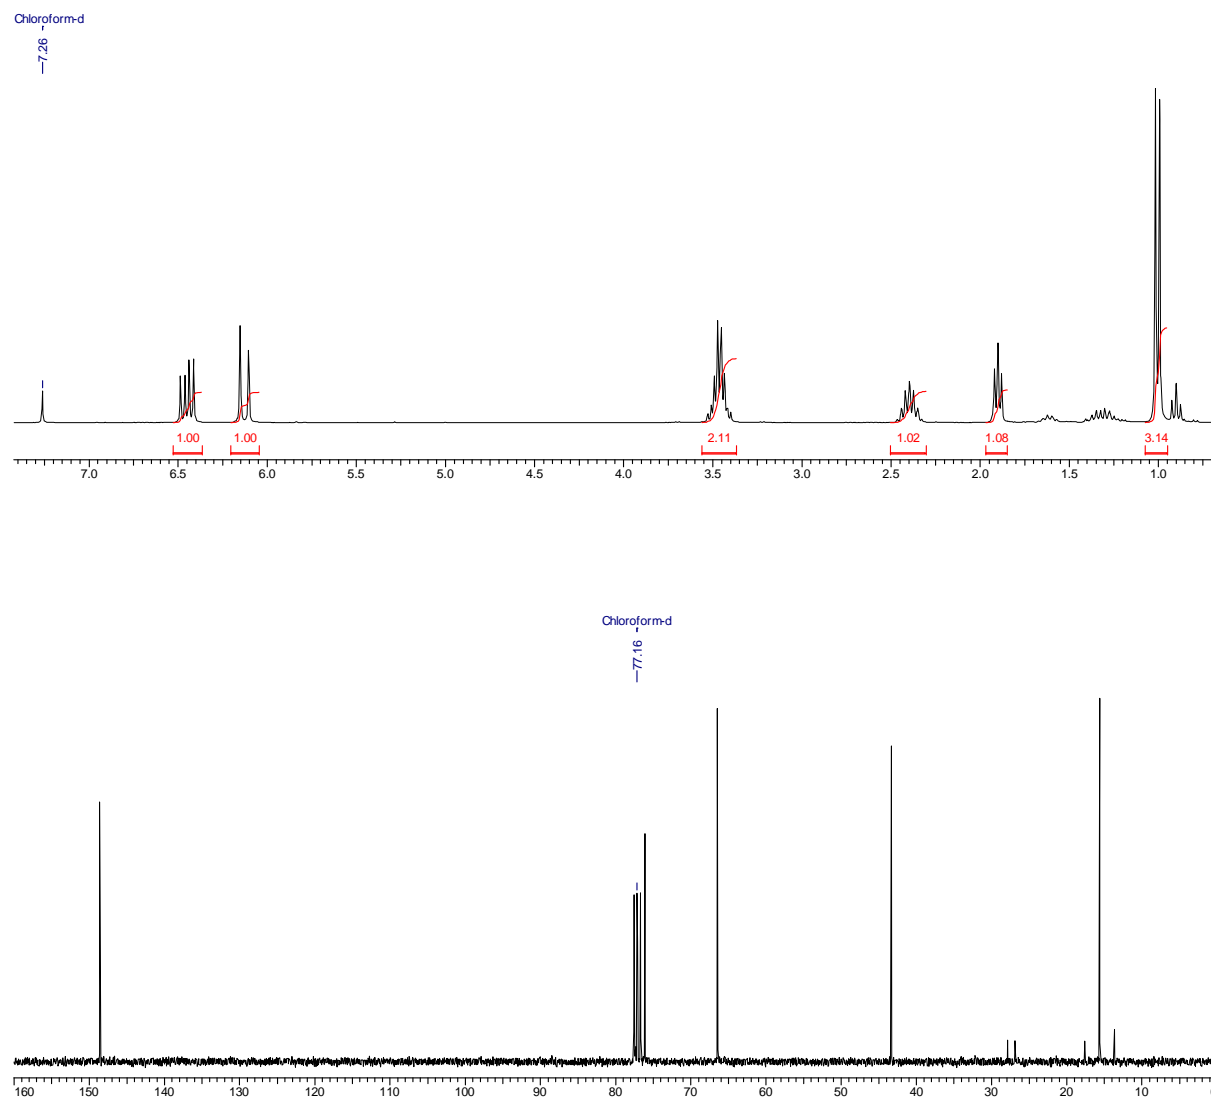

## Supporting Information

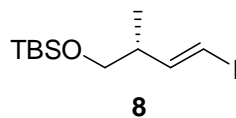

$[\alpha]_D^{25} +20.8$ , (*c* 1.0,  $\text{CHCl}_3$ );  $^1\text{H NMR}$  (400 MHz,  $\text{CDCl}_3$ )  $\delta$  0.05 (6H, s, 2 x  $\text{CH}_3$ ), 0.90 (9H, s, 3 x  $\text{CH}_3$ ), 1.01 (3H, d,  $J = 6.8$  Hz,  $\text{CH}_3$ ), 2.33-2.40 (1H, m,  $\text{CH}$ ), 3.45 (1H, dd,  $J = 9.8$  and 6.4 Hz,  $\text{CH}_2$ ), 3.48 (1H, dd,  $J = 9.8$  and 6.4 Hz,  $\text{CH}_2$ ), 6.06 (1H, br dd,  $J = 14.6$  Hz,  $\text{CH}$ ), 6.49 (1H, dd,  $J = 14.6$  and 6.5 Hz,  $\text{CH}$ );  $^{13}\text{C NMR}$  (100 MHz,  $\text{CDCl}_3$ )  $\delta$  -5.2 (2 x  $\text{CH}_3$ ), 15.7 ( $\text{CH}_3$ ), 18.4 (C), 26.0 (3 x  $\text{CH}_3$ ), 43.3 (CH), 67.0 ( $\text{CH}_2$ ), 75.2 (CH), 149.2 (CH); **IR** (thin film)  $\nu_{\text{max}} = 2955, 2928, 2856, 1605, 1471, 1386, 1361, 1252, 1187, 1088, 1024, 1006, 947$   $\text{cm}^{-1}$ ; **LRMS**  $m/z$  (ESI) 349 ( $\text{M}+\text{Na}$ ) $^+$ ; **HRMS**  $m/z$  (ESI) calcd for  $\text{C}_{11}\text{H}_{24}\text{OSi}$  [ $\text{M}+\text{H}$ ] $^+$ : 327.0636, found 327.0640

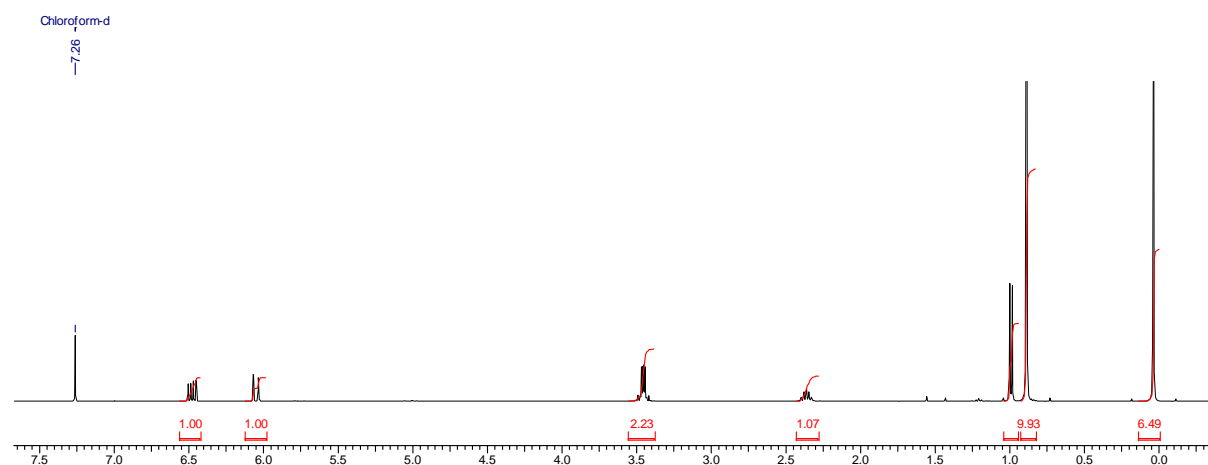

## Supporting Information

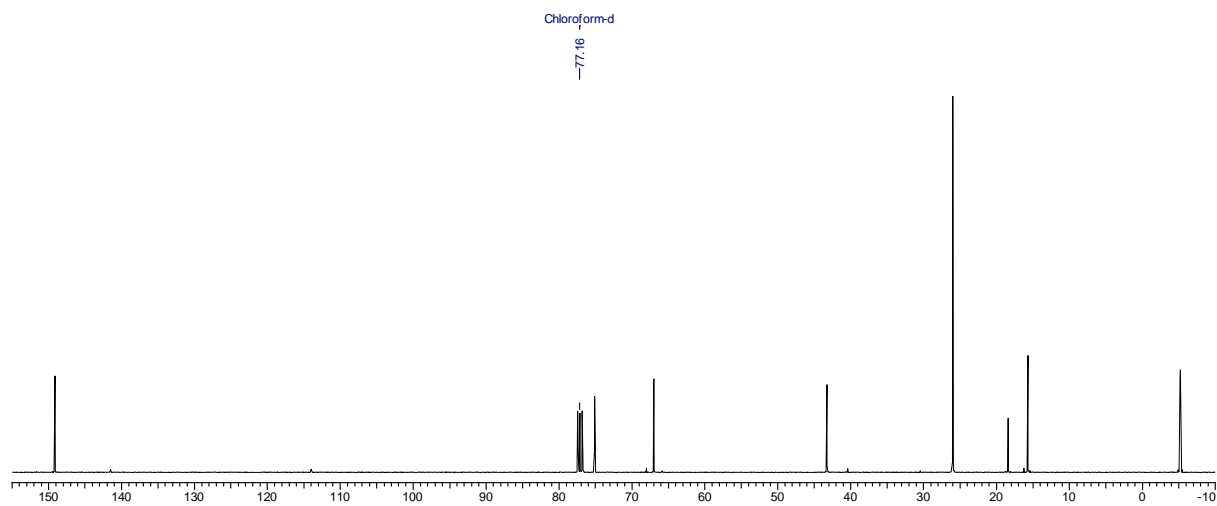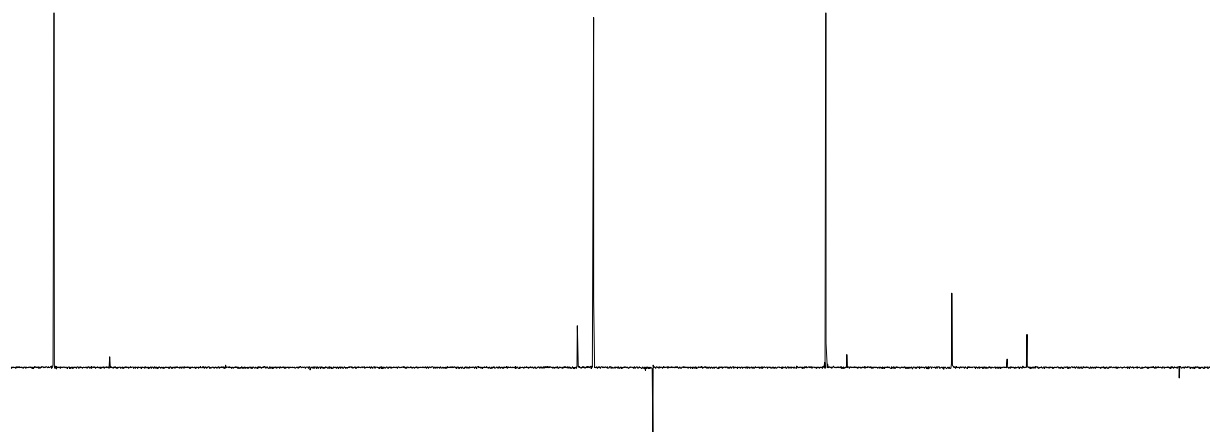

## Supporting Information

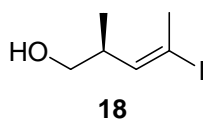

$[\alpha]_D^{25}$  -31.3, (*c* 1.0,  $\text{CHCl}_3$ );  $^1\text{H NMR}$  (400 MHz,  $\text{CDCl}_3$ )  $\delta$  0.95 (3H, d,  $J = 6.8$  Hz,  $\text{CH}_3$ ), 1.82-1.85 (1H, m, OH), 2.41 (3H, d,  $J = 1.5$  Hz,  $\text{CH}_3$ ), 2.57-2.68 (1H, m, CH), 3.36-3.51 (2H, m,  $\text{CH}_2$ ), 5.96 (1H, br dq,  $J = 9.8, 1.5$  Hz, CH);  $^{13}\text{C NMR}$  (100 MHz,  $\text{CDCl}_3$ )  $\delta$  16.4 ( $\text{CH}_3$ ), 28.2 ( $\text{CH}_3$ ), 38.6 (CH), 67.0 ( $\text{CH}_2$ ), 95.6 (CH), 143.6 (CH); IR (thin film)  $\nu_{\text{max}} = 3332, 2958, 2926, 2870, 1635, 1429, 1377, 1217, 1119, 1076, 1030, 996, \text{cm}^{-1}$ ; LRMS  $m/z$  (ESI) 249 ( $\text{M}+\text{Na}$ ) $^+$ ; HRMS  $m/z$  (ESI) calcd for  $\text{C}_6\text{H}_{15}\text{NOI}$  [ $\text{M}+\text{NH}_4$ ] $^+$ : 244.0193, found 244.0185.

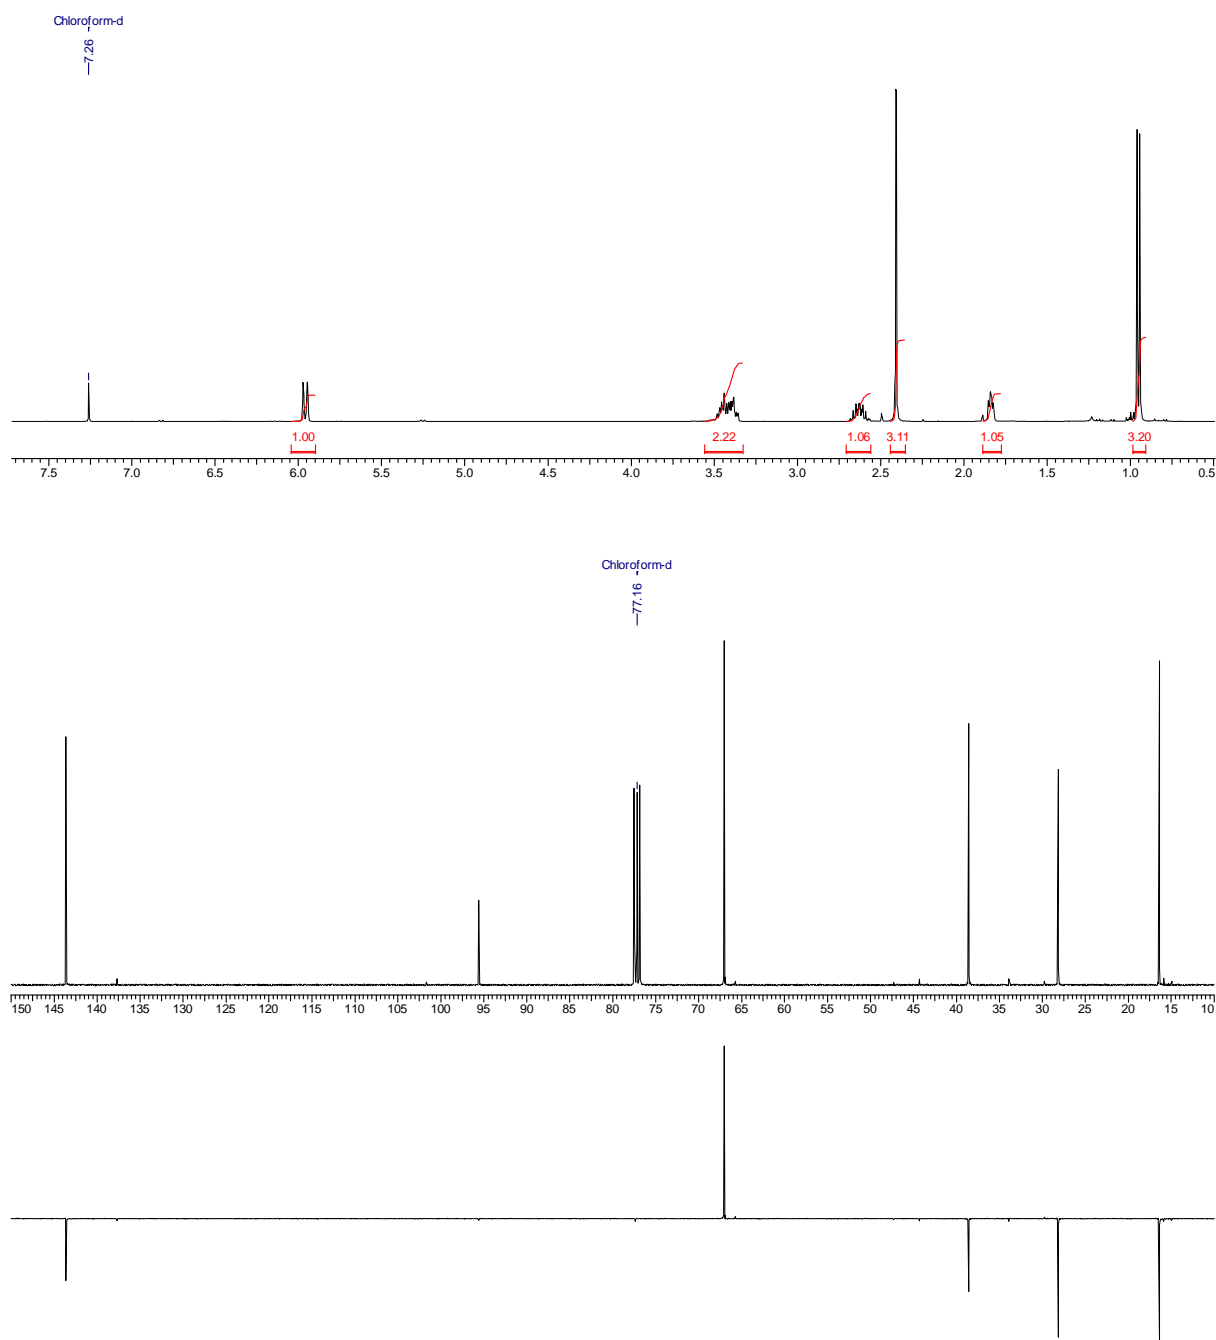

## Supporting Information

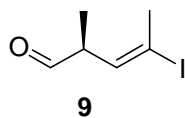

**$^1\text{H}$  NMR** (400 MHz,  $\text{CDCl}_3$ )  $\delta$  1.21 (3H, d,  $J = 7.0$  Hz,  $\text{CH}_3$ ), 2.46 (3H, d,  $J = 1.5$  Hz,  $\text{CH}_3$ ), 3.23-3.31 (1H, m,  $\text{CH}$ ), 6.06 (1H, br dq,  $J = 9.3, 1.5$  Hz,  $\text{CH}$ ), 9.51 (1H, d,  $J = 1.7$  Hz,  $\text{CH}$ );  
 **$^{13}\text{C}$  NMR** (100 MHz,  $\text{CDCl}_3$ )  $\delta$  13.8 ( $\text{CH}_3$ ), 28.4 ( $\text{CH}_3$ ), 48.8 ( $\text{CH}$ ), 67.0 ( $\text{CH}_2$ ), 98.1 ( $\text{CH}$ ), 136.6 ( $\text{CH}$ ), 199.3 ( $\text{CHO}$ ).

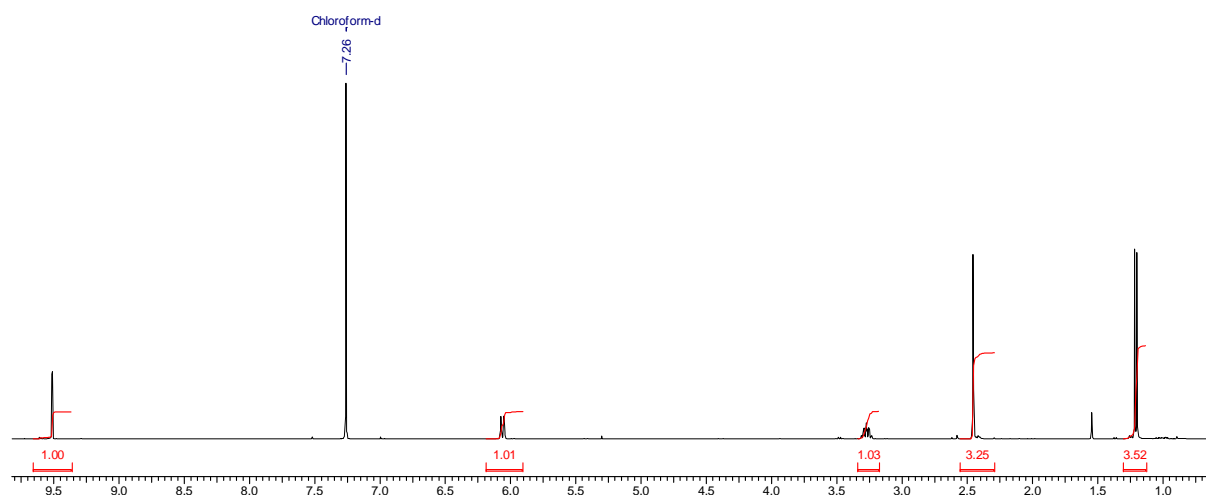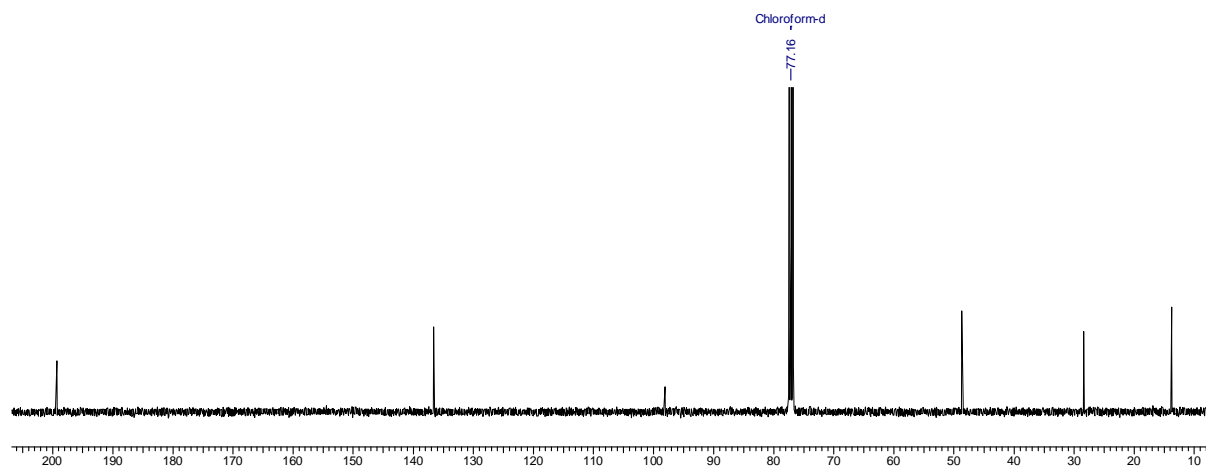

## Supporting Information

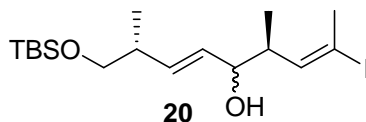

*Major diastereoisomer only:*  $^1\text{H NMR}$  (400 MHz,  $\text{CDCl}_3$ )  $\delta$  0.05 (6H, s, 2 x  $\text{CH}_3$ ), 0.89 (1H, s, 3 x  $\text{CH}_3$ ), 1.00 (6H, d,  $J = 6.8$  Hz, 2 x  $\text{CH}_3$ ), 1.66 (1H, br s,  $\text{OH}$ ), 2.29-2.36 (1H, m,  $\text{CH}$ ), 2.39 (3H, d,  $J = 1.5$  Hz,  $\text{CH}_3$ ), 2.50-2.59 (1H, m,  $\text{CH}$ ), 3.40 (1H, dd,  $J = 9.8$  and 6.8 Hz,  $\text{CH}_2$ ), 3.49 (1H, dd,  $J = 9.8$  and 6.3 Hz,  $\text{CH}_2$ ), 3.88 (1H, app br t,  $J = 6.5$  Hz,  $\text{CH}$ ), 5.45 (1H, br dd,  $J = 15.6$  and 6.8 Hz,  $\text{CH}$ ), 5.60 (1H, br dd,  $J = 15.6$  and 6.3 Hz,  $\text{CH}$ ), 5.99 (1H, br dq,  $J = 9.8$  and 1.5 Hz,  $\text{CH}$ );  $^{13}\text{C NMR}$  (100 MHz,  $\text{CDCl}_3$ )  $\delta$  -5.3 (2 x  $\text{CH}_3$ ), 15.9 ( $\text{CH}_3$ ), 16.5 ( $\text{CH}_3$ ), 18.3 (C), 25.9 (3 x  $\text{CH}_3$ ), 28.1 ( $\text{CH}_3$ ), 39.0 ( $\text{CH}$ ), 41.7 ( $\text{CH}$ ), 67.9 ( $\text{CH}_2$ ), 76.3 ( $\text{CH}$ ), 94.6 (C), 129.8 ( $\text{CH}$ ), 135.8 ( $\text{CH}$ ), 142.9 ( $\text{CH}$ ); **IR** (thin film)  $\nu_{\text{max}} = 3419, 2958, 2930, 2858, 1638, 1473, 1388, 1257, 1089, 1009, 974$   $\text{cm}^{-1}$ ; **LRMS**  $m/z$  (ESI) 447 ( $\text{M}+\text{Na}$ ) $^+$ ; **HRMS**  $m/z$  (ESI) calcd for  $\text{C}_{17}\text{H}_{37}\text{NO}_2\text{SiI}$  [ $\text{M}+\text{NH}_4$ ] $^+$ : 442.1633, found 442.1633.

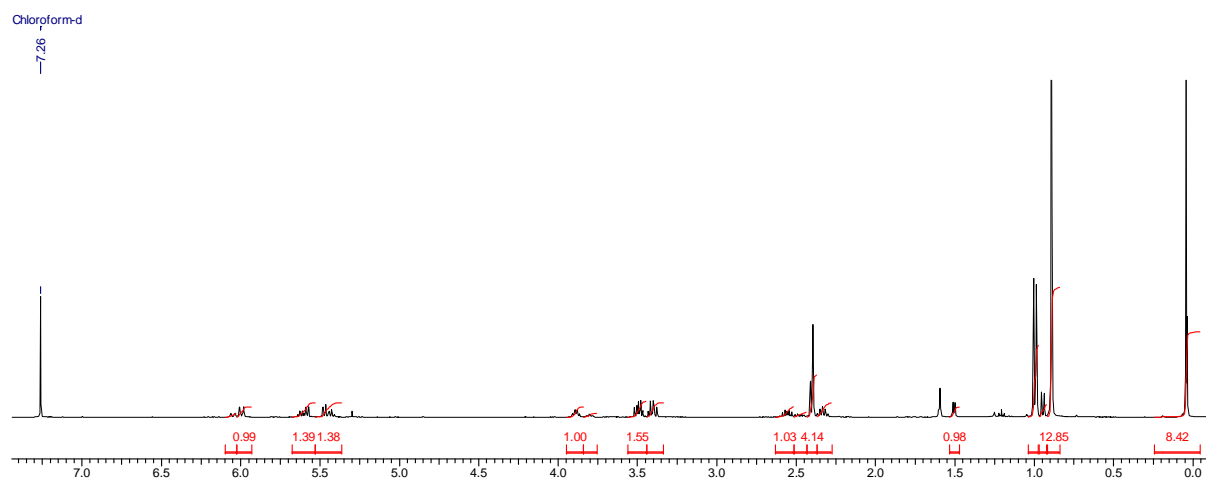

## Supporting Information

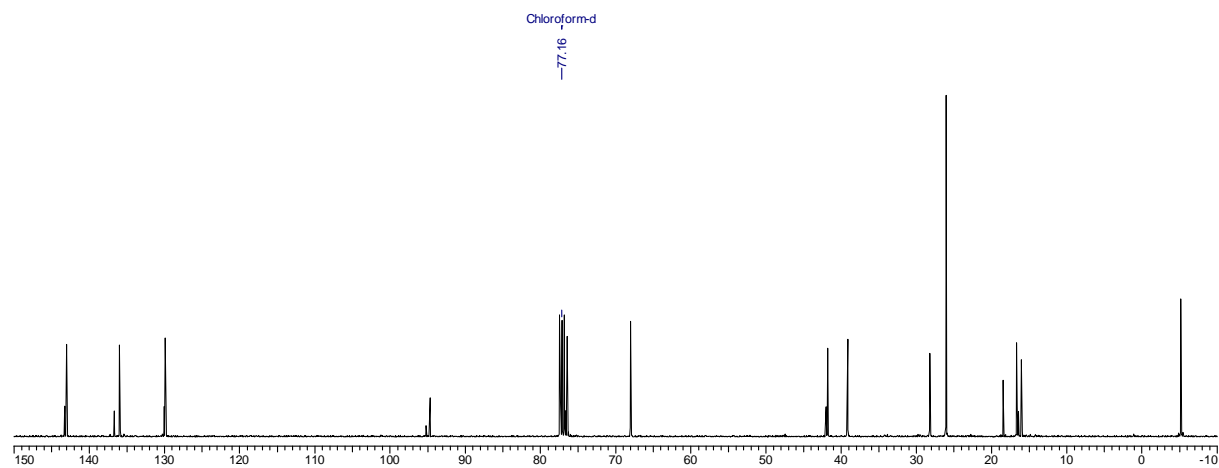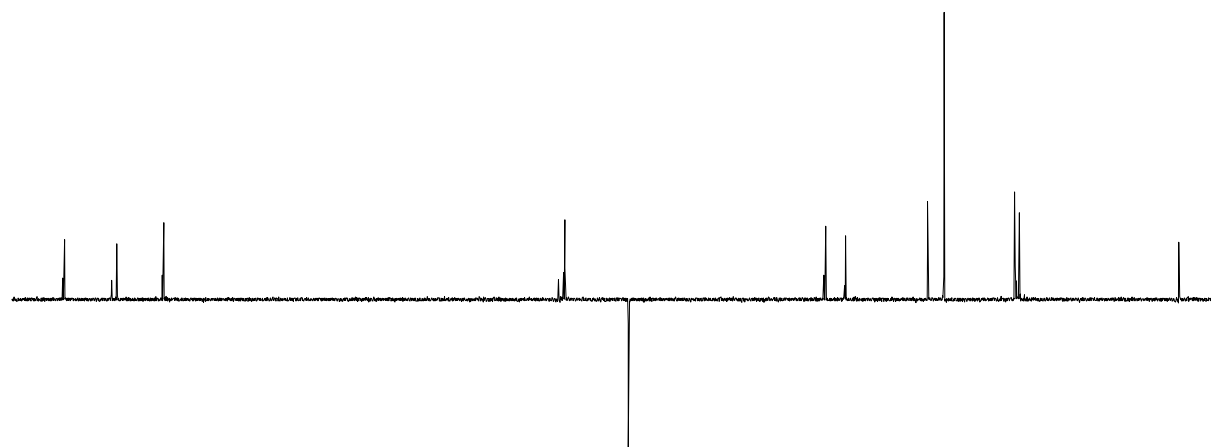



## Supporting Information

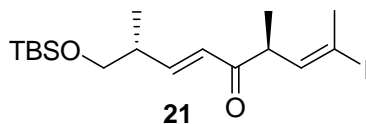

$[\alpha]_D^{21} +52.5$  (*c* 1.0,  $\text{CHCl}_3$ );  $^1\text{H NMR}$  (400 MHz,  $\text{C}_6\text{D}_6$ )  $\delta$  0.00 (6H, s, 2 x  $\text{CH}_3$ ), 0.82 (3H, d,  $J = 6.8$  Hz,  $\text{CH}_3$ ), 0.94 (9H, s, 3 x  $\text{CH}_3$ ), 0.99 (3H, d,  $J = 7.0$  Hz,  $\text{CH}_3$ ), 2.12 (3H, br d,  $J = 1.5$  Hz,  $\text{CH}_3$ ), 2.22 (1H, app sept,  $J = 6.3$  Hz, CH), 3.19 (1H, dq,  $J = 9.8$  and 7.0 Hz, CH), 3.28 (2H, d,  $J = 6.0$  Hz,  $\text{CH}_2$ ), 6.06 (1H, br dd,  $J = 15.8$  and 1.3 Hz, CH), 6.25 (1H, br dq,  $J = 9.8$  and 1.5 Hz, CH), 6.90 (1H, dd,  $J = 15.8$  and 7.3 Hz, CH);  $^{13}\text{C NMR}$  (100 MHz,  $\text{C}_6\text{D}_6$ )  $\delta$  -5.3 (2 x  $\text{CH}_3$ ), 15.7 ( $\text{CH}_3$ ), 16.3 ( $\text{CH}_3$ ), 18.5 (C), 26.1 (3 x  $\text{CH}_3$ ), 27.9 ( $\text{CH}_3$ ), 39.6 (CH), 47.2 (CH), 67.1 ( $\text{CH}_2$ ), 96.1 (C), 127.5 (CH), 140.3 (CH), 149.8 (CH), 196.9 (C); **IR** (thin film)  $\nu_{\text{max}} = 2955, 2927, 2854, 1697, 1673, 1626, 1471, 1459, 1253, 1189, 1129, 1097, 1084, 1029, 980$   $\text{cm}^{-1}$ ; **LRMS**  $m/z$  (ESI) 445 ( $\text{M}+\text{Na}$ ) $^+$ ; **HRMS**  $m/z$  (ESI) calcd for  $\text{C}_{17}\text{H}_{32}\text{O}_2\text{SiI}$   $[\text{M}+\text{H}]^+$ : 423.1211, found 423.1211.

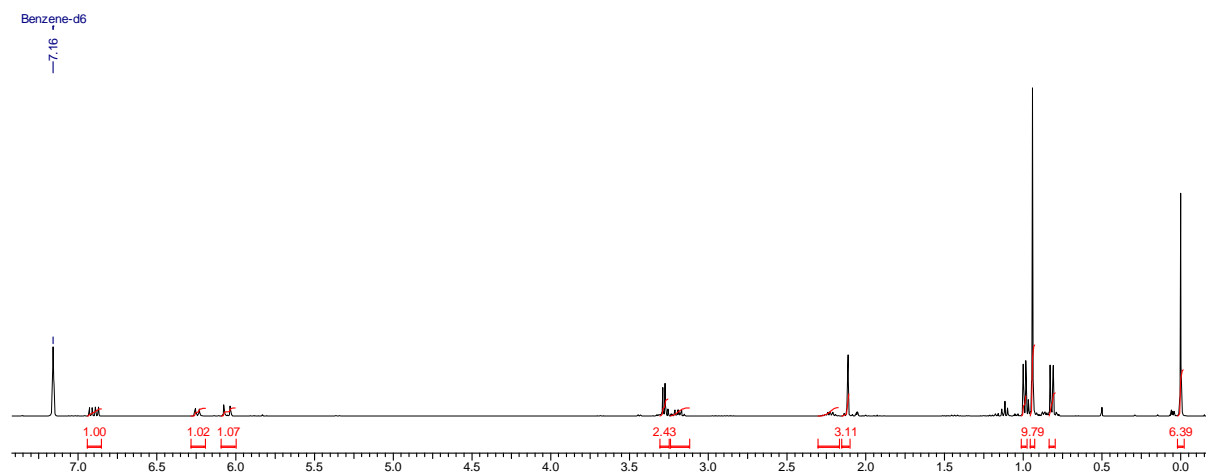

## Supporting Information

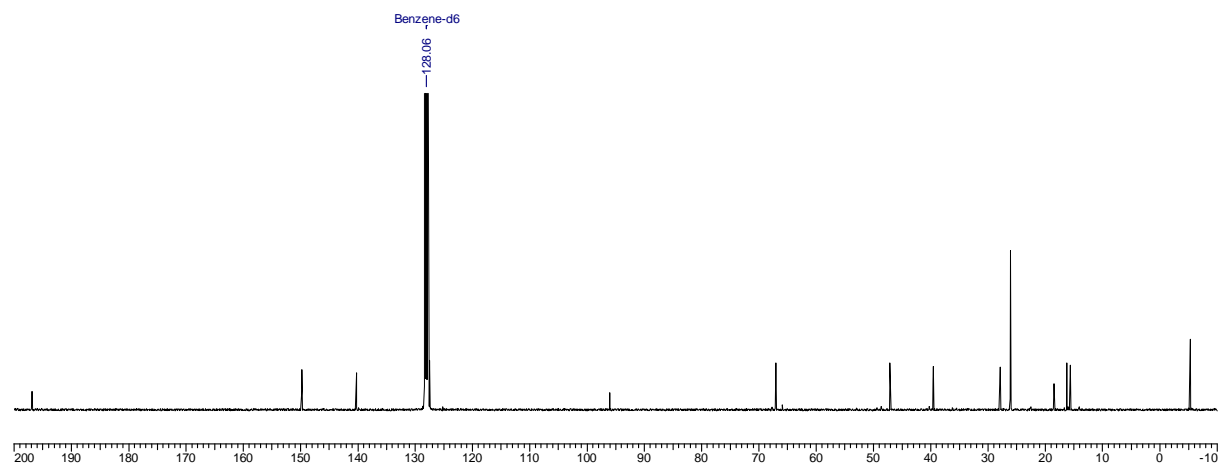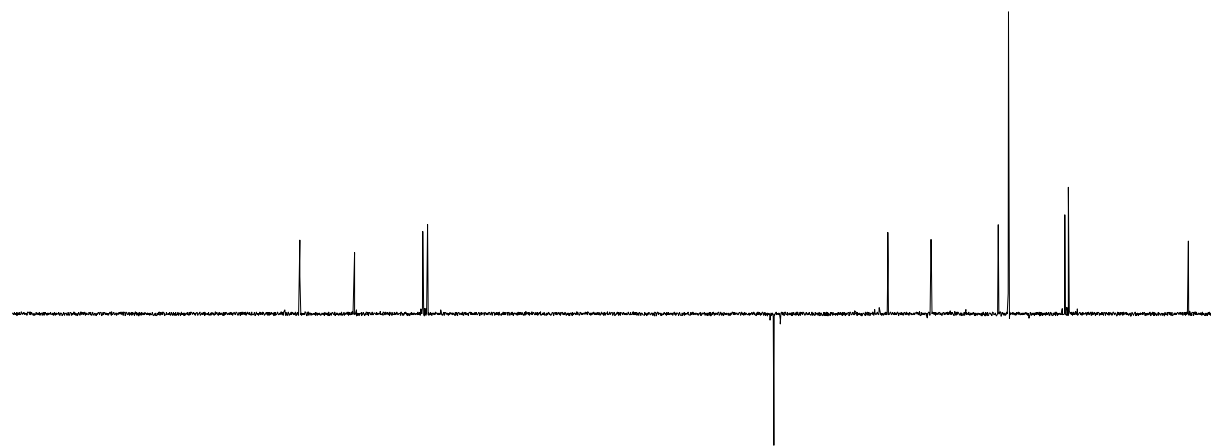

## Supporting Information

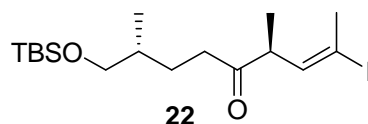

$[\alpha]_D^{22} +65.6$ , ( $c$  1.0,  $\text{CHCl}_3$ );  $^1\text{H NMR}$  (400 MHz,  $\text{CDCl}_3$ )  $\delta$  0.05 (6H, s, 2 x  $\text{CH}_3$ ), 0.87 (3H, d,  $J = 6.6$  Hz,  $\text{CH}_3$ ), 0.90 (9H, s, 3 x  $\text{CH}_3$ ), 1.16 (3H, d,  $J = 6.8$  Hz,  $\text{CH}_3$ ), 1.30-1.43 (1H, m,  $\text{CH}_2$ ), 1.51-1.62 (1H, m,  $\text{CH}$ ), 1.62-1.73 (1H, m,  $\text{CH}_2$ ), 2.36-2.55 (2H, m,  $\text{CH}_2$ ), 2.46 (3H, d,  $J = 1.5$  Hz,  $\text{CH}_3$ ), 3.33-3.40 (1H, m,  $\text{CH}$ ), 3.42 (2H, d,  $J = 5.9$  Hz,  $\text{CH}_2$ ), 6.12 (1H, dq,  $J = 10.0$  and 1.5 Hz,  $\text{CH}$ );  $^{13}\text{C NMR}$  (100 MHz,  $\text{CDCl}_3$ )  $\delta$  -5.2 (2 x  $\text{CH}_3$ ), 16.3 ( $\text{CH}_3$ ), 16.8 ( $\text{CH}_3$ ), 18.5 (C), 26.1 (3 x  $\text{CH}_3$ ), 27.4 ( $\text{CH}_2$ ), 28.1 ( $\text{CH}_3$ ), 35.4 ( $\text{CH}$ ), 38.8 ( $\text{CH}_2$ ), 48.7 ( $\text{CH}$ ), 68.2 ( $\text{CH}_2$ ), 96.1 (C), 139.9 ( $\text{CH}$ ), 209.9 (C); **IR** (thin film)  $\nu_{\text{max}} = 2955, 2929, 2883, 2856, 1716, 1472, 1462, 1434, 1252, 1117, 1091, 1037, 1028, 1005$   $\text{cm}^{-1}$ ; **LRMS**  $m/z$  (ESI) 447 ( $\text{M}+\text{Na}$ ) $^+$ ; **HRMS**  $m/z$  (ESI) calcd for  $\text{C}_{17}\text{H}_{34}\text{O}_2\text{SiI}$  [ $\text{M}+\text{H}$ ] $^+$ : 425.1367, found 425.1367.

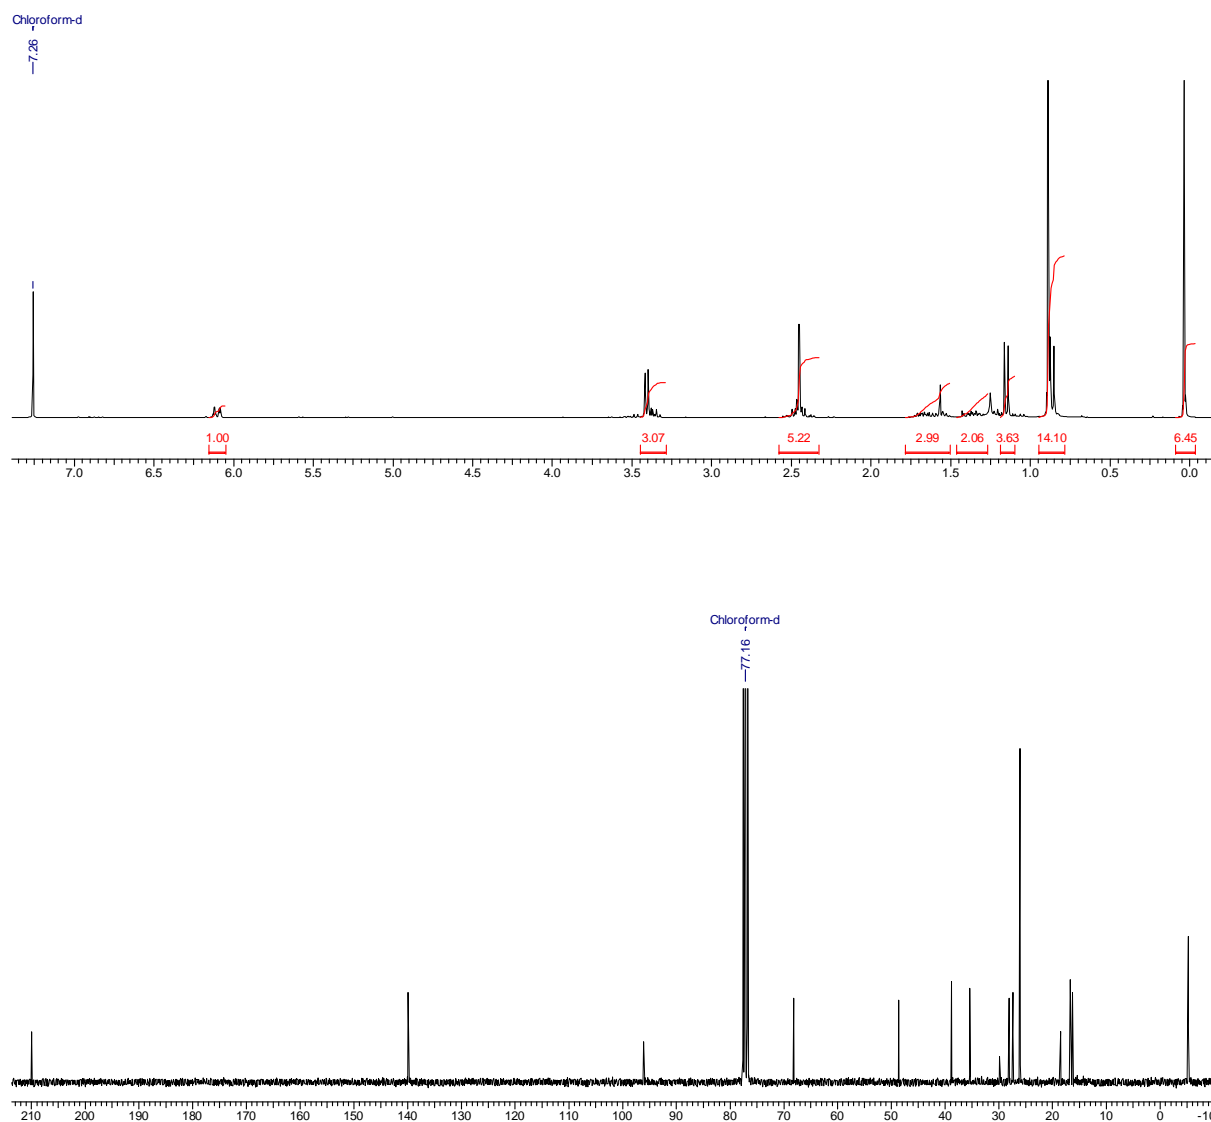

## Supporting Information

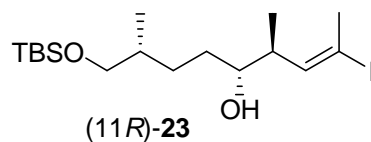

$[\alpha]_D^{36}$  -23.0, (*c* 1.0,  $\text{CHCl}_3$ );  $^1\text{H NMR}$  (300 MHz,  $\text{C}_6\text{D}_6$ )  $\delta$  0.07 (6H, s, 2 x  $\text{CH}_3$ ), 0.79 (3H, d,  $J = 6.9$  Hz,  $\text{CH}_3$ ), 0.87 (3H, d,  $J = 6.7$  Hz,  $\text{CH}_3$ ), 0.98 (9H, s, 3 x  $\text{CH}_3$ ), 1.19-1.45 (5H, m, 2 x  $\text{CH}_2$  and OH), 1.51-1.61 (1H, m, CH), 2.12-2.24 (1H, m, CH), 2.17 (3H, d,  $J = 1.3$  Hz,  $\text{CH}_3$ ), 3.05-3.11 (1H, m, CH), 3.33-3.42 (1H, m,  $\text{CH}_2$ ), 6.16 (1H, br dq,  $J = 10.0$  and 1.3 Hz, CH);  $^{13}\text{C NMR}$  (75 MHz,  $\text{C}_6\text{D}_6$ )  $\delta$  -5.1 (2 x  $\text{CH}_3$ ), 16.8 ( $\text{CH}_3$ ), 17.1 ( $\text{CH}_3$ ), 18.6 (C), 26.3 (3 x  $\text{CH}_3$ ), 28.1 ( $\text{CH}_3$ ), 29.7 ( $\text{CH}_2$ ), 32.4 ( $\text{CH}_2$ ), 36.0 (CH), 41.9 (CH), 68.6 ( $\text{CH}_2$ ), 74.9 (CH), 94.6 (C), 143.5 (CH); **IR (thin film)**  $\nu_{\text{max}} = 3397, 2954, 2928, 2856, 1462, 1377, 1361, 1251, 1090$   $\text{cm}^{-1}$ ; **LRMS  $m/z$**  (ESI) 449 ( $\text{M}+\text{Na}$ ) $^+$ ; **HRMS  $m/z$**  (ESI) calcd for  $\text{C}_{17}\text{H}_{36}\text{O}_2\text{SiI}$   $[\text{M}+\text{H}]^+$ : 427.1524, found 427.1523.

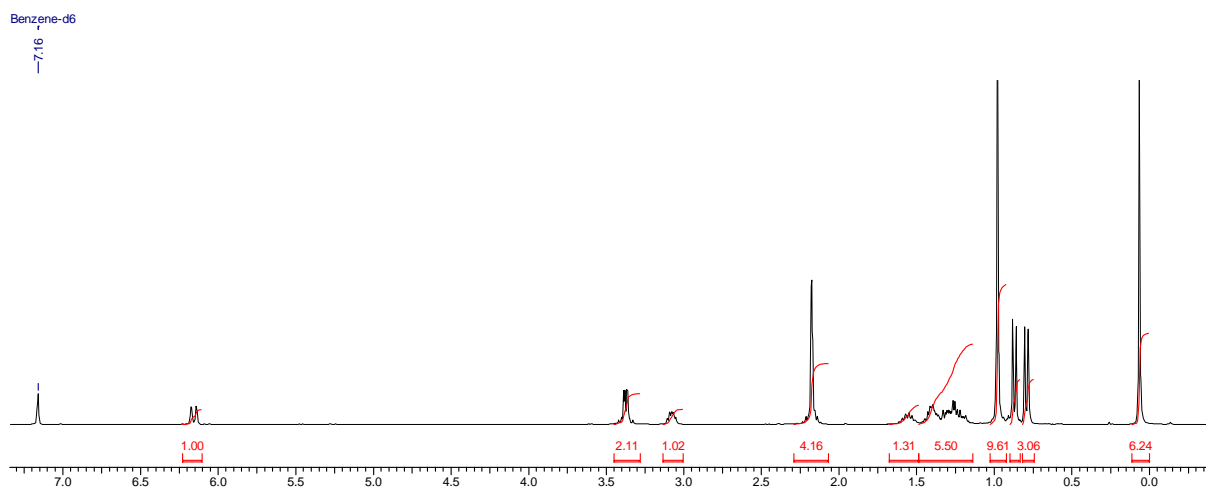

## Supporting Information

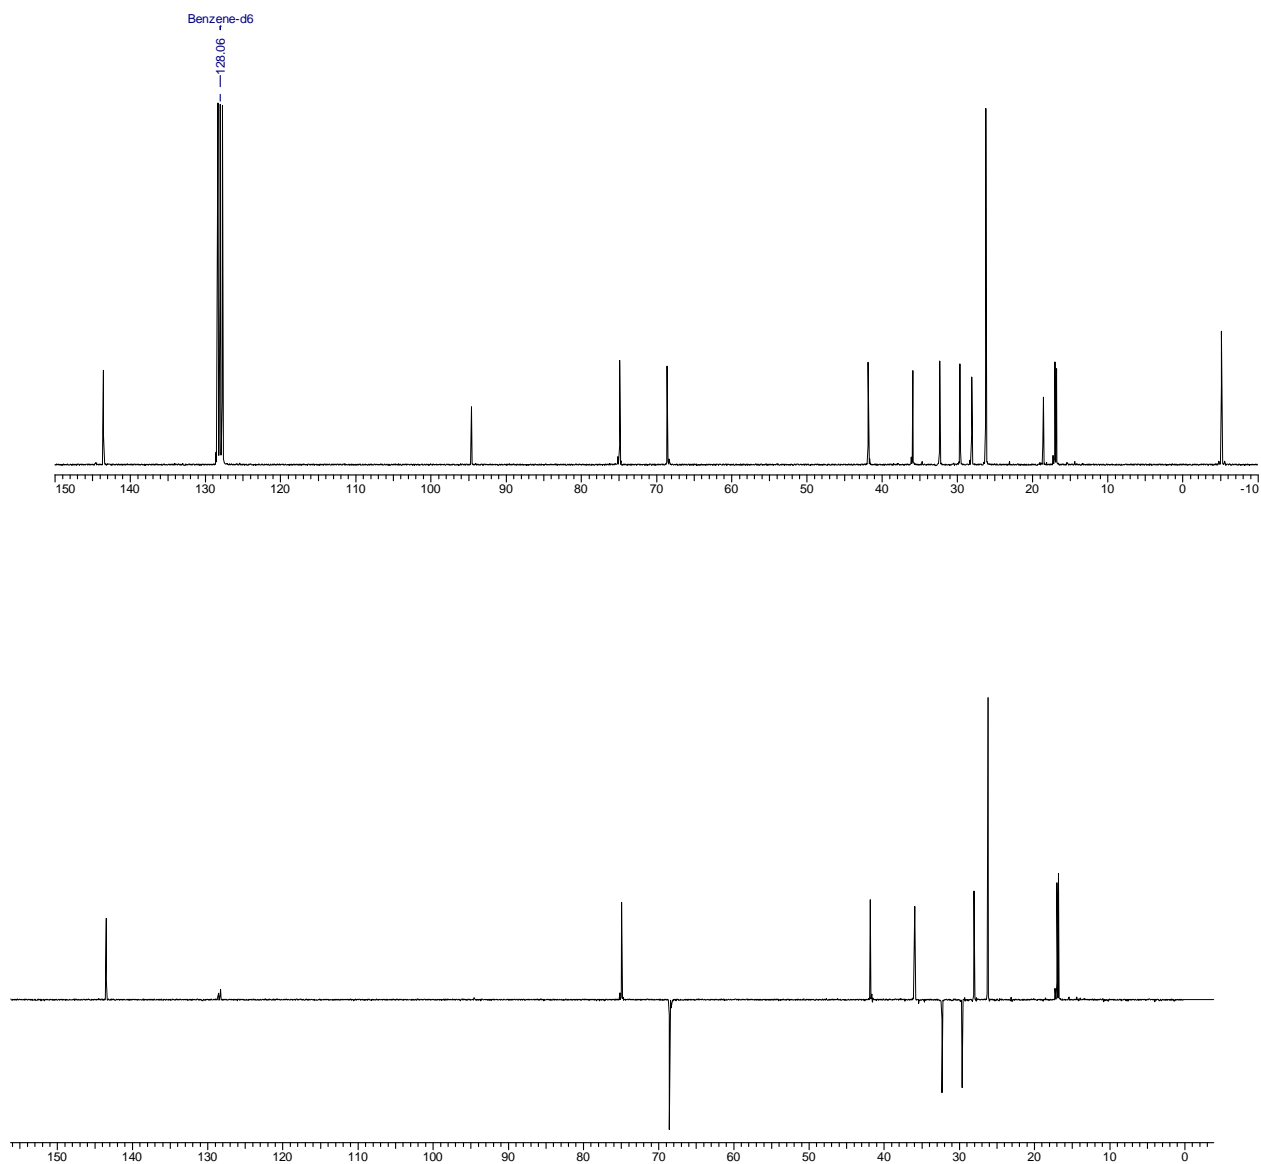

## Supporting Information

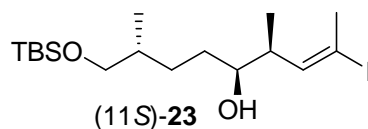

$[\alpha]_D^{36}$  -31.8, ( $c$  1.0,  $\text{CHCl}_3$ );  $^1\text{H NMR}$  (300 MHz,  $\text{C}_6\text{D}_6$ )  $\delta$  0.07 (6H, s, 2 x  $\text{CH}_3$ ), 0.84 (3H, d,  $J = 6.8$  Hz,  $\text{CH}_3$ ), 0.89 (3H, d,  $J = 6.4$  Hz,  $\text{CH}_3$ ), 0.98 (9H, s, 3 x  $\text{CH}_3$ ), 0.99-1.06 (1H, m,  $\text{CH}_2$ ), 1.11-1.21 (1H, m,  $\text{CH}_2$ ), 1.25 (1H, br s, OH), 1.35-1.46 (1H, m,  $\text{CH}_2$ ), 1.48-1.60 (2H, m, CH and  $\text{CH}_2$ ), 2.17 (3H, d,  $J = 1.5$  Hz,  $\text{CH}_3$ ), 2.19-2.27 (1H, m, CH), 3.03-3.11 (1H, m, CH), 3.34 (1H, dd,  $J = 9.8$  and 5.6 Hz,  $\text{CH}_2$ ), 3.41 (1H, dd,  $J = 9.8$  and 5.6 Hz,  $\text{CH}_2$ ), 6.08 (1H, dq,  $J = 10.0$  and 1.5 Hz, CH);  $^{13}\text{C NMR}$  (75 MHz,  $\text{C}_6\text{D}_6$ )  $\delta$  -5.1 (2 x  $\text{CH}_3$ ), 15.5 ( $\text{CH}_3$ ), 17.3 ( $\text{CH}_3$ ), 18.6 (C), 26.3 (3 x  $\text{CH}_3$ ), 28.0 ( $\text{CH}_3$ ), 29.8 ( $\text{CH}_2$ ), 32.4 ( $\text{CH}_2$ ), 36.1 ( $\text{CH}_3$ ), 42.0 (CH), 68.3 ( $\text{CH}_2$ ), 75.2 (CH), 94.1 (C), 144.5 (CH); IR (thin film)  $\nu_{\text{max}} = 3358, 2954, 2928, 2856, 1633, 1462, 1378, 1361, 1252, 1092$   $\text{cm}^{-1}$ ; LRMS  $m/z$  (ESI) 449 ( $\text{M}+\text{Na}$ ) $^+$ ; HRMS  $m/z$  (ESI) calcd for  $\text{C}_{17}\text{H}_{36}\text{O}_2\text{SiI}$  [ $\text{M}+\text{H}$ ] $^+$ : 427.1524, found 427.1521.

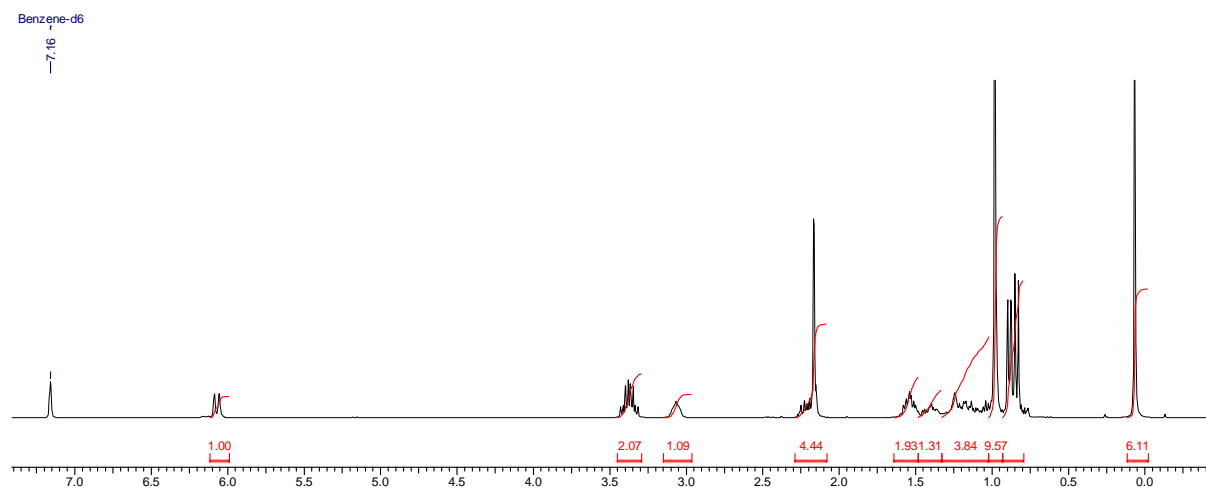

## Supporting Information

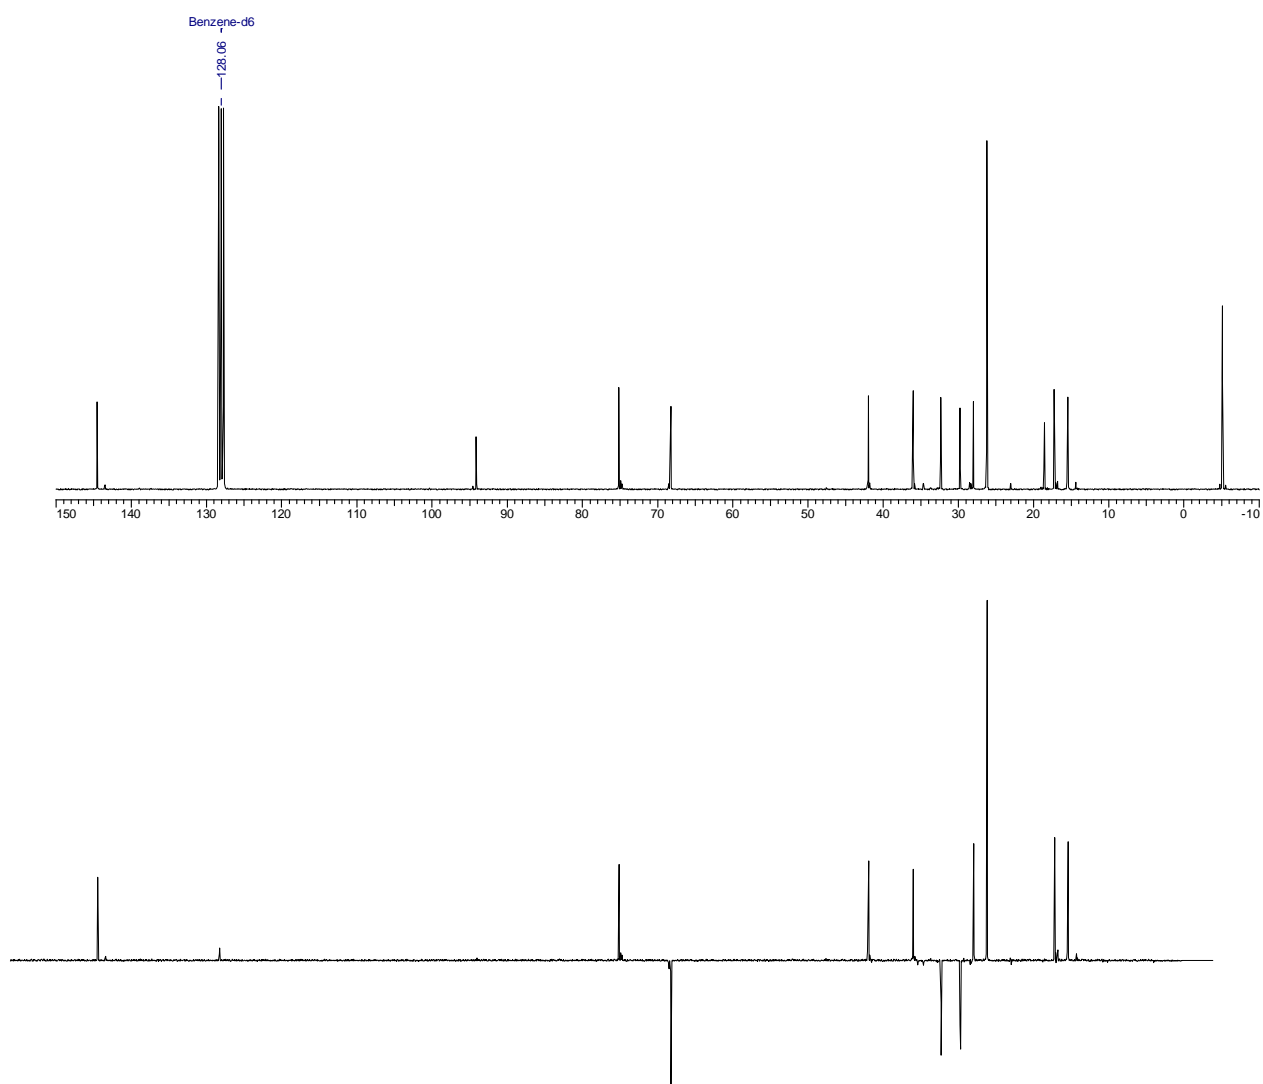

## Supporting Information

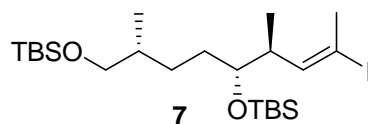

$[\alpha]_D^{25}$  -33.3, (*c* 1.0, CHCl<sub>3</sub>);  $^1\text{H NMR}$  (300 MHz, C<sub>6</sub>D<sub>6</sub>)  $\delta$  0.07 (6H, s, 2 x CH<sub>3</sub>), 0.08 (6H, s, 2 x CH<sub>3</sub>), 0.85 (3H, d, *J* = 6.8 Hz, CH<sub>3</sub>), 0.90 (3H, d, *J* = 6.5 Hz, CH<sub>3</sub>), 0.98 (9H, s, 3 x CH<sub>3</sub>), 1.00 (9H, s, 3 x CH<sub>3</sub>), 1.10-1.20 (1H, m, CH<sub>2</sub>), 1.33-1.61 (4H, m, CH<sub>2</sub> and CH<sub>2</sub> and CH), 2.24 (3H, d, *J* = 1.5 Hz, CH<sub>3</sub>), 2.37-2.49 (1H, m, CH), 3.35-3.45 (3H, m, CH and CH<sub>2</sub>), 6.24 (1H, dq, *J* = 10.0 and 1.4 Hz, CH);  $^{13}\text{C NMR}$  (100 MHz, C<sub>6</sub>D<sub>6</sub>)  $\delta$  -5.2 (2 x CH<sub>3</sub>), -4.1 (CH<sub>3</sub>), -4.0 (CH<sub>3</sub>), 16.4 (CH<sub>3</sub>), 16.9 (CH<sub>3</sub>), 18.3 (C), 18.6 (CH<sub>3</sub>), 26.2 (3 x CH<sub>3</sub>), 26.2 (3 x CH<sub>3</sub>), 28.0 (CH<sub>3</sub>), 28.7 (CH<sub>2</sub>), 32.1 (CH<sub>2</sub>), 36.4 (CH), 40.8 (CH), 68.5 (CH<sub>2</sub>), 75.9 (CH), 94.1 (C), 144.3 (CH); **LRMS** *m/z* (ESI) 563 (M+Na)<sup>+</sup>; **HRMS** *m/z* (ESI) calcd for C<sub>23</sub>H<sub>53</sub>NO<sub>2</sub>Si<sub>2</sub>I [M+NH<sub>4</sub>]<sup>+</sup>: 558.2654, found 558.2651.

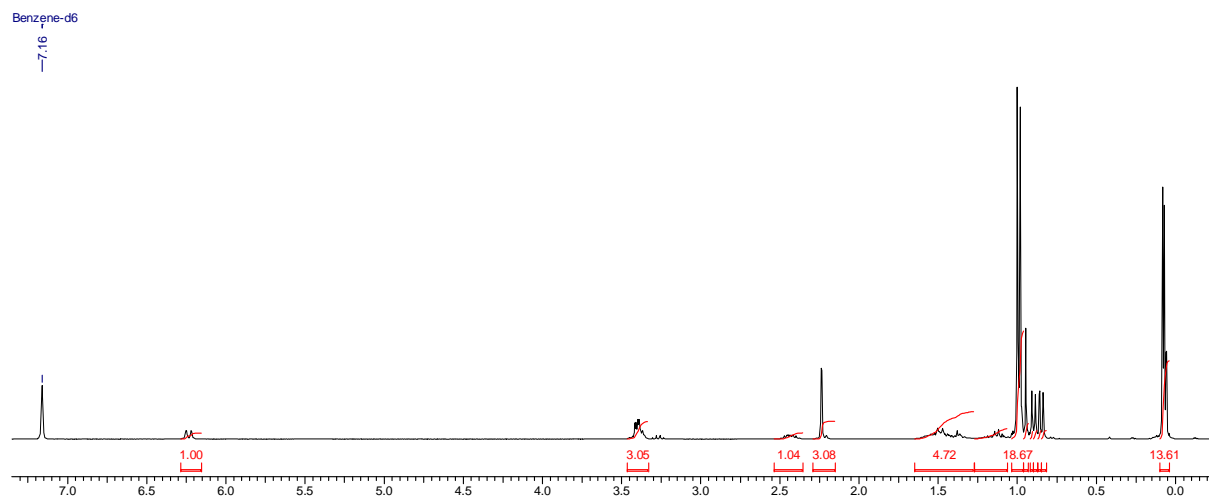



## Supporting Information

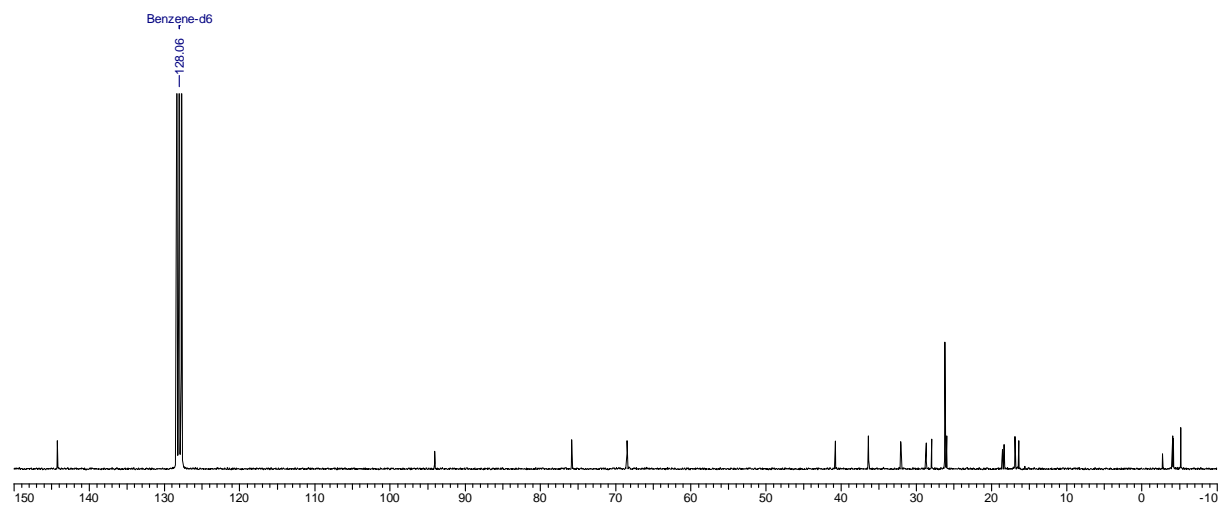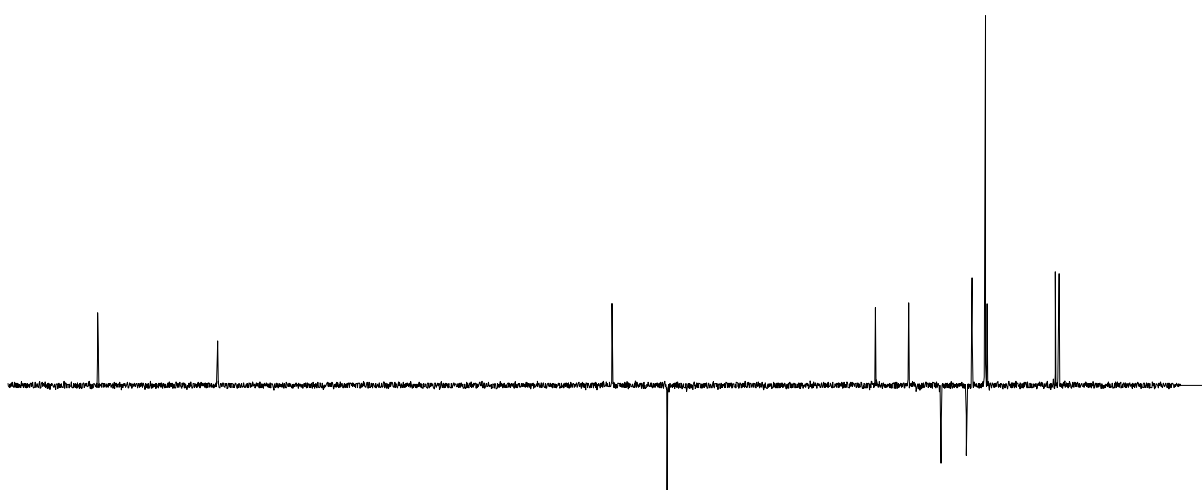

## Supporting Information

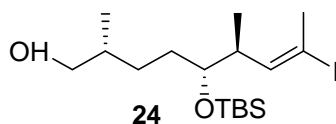

$[\alpha]_D^{25}$  -32.8, (*c* 1.0,  $\text{CHCl}_3$ );  $^1\text{H NMR}$  (400 MHz,  $\text{C}_6\text{D}_6$ )  $\delta$  0.05 (3H, s,  $\text{CH}_3$ ), 0.06 (3H, s,  $\text{CH}_3$ ), 0.83 (2 x 3H, 2 x d overlapped,  $J = 6.7$  Hz, 2 x  $\text{CH}_3$ ), 0.97 (9H, s, 3 x  $\text{CH}_3$ ), 1.01-1.06 (1H, m,  $\text{CH}_2$ ), 1.29-1.49 (4H, m,  $\text{CH}_2$  and  $\text{CH}_2$  and  $\text{CH}$ ), 2.22 (3H, d,  $J = 1.5$  Hz,  $\text{CH}_3$ ), 2.35-2.44 (1H, m,  $\text{CH}$ ), 3.17 (1H, dd,  $J = 10.0$  and  $6.0$  Hz,  $\text{CH}_2$ ), 3.23 (1H, dd,  $J = 10.3$  and  $5.5$  Hz,  $\text{CH}_2$ ), 3.33 (1H, q,  $J = 5.0$  Hz,  $\text{CH}$ ), 6.23 (1H, br dq,  $J = 10.0$  and  $1.5$  Hz,  $\text{CH}$ );  $^{13}\text{C NMR}$  (75 MHz,  $\text{C}_6\text{D}_6$ )  $\delta$  -4.2 ( $\text{CH}_3$ ), -4.1 ( $\text{CH}_3$ ), 16.5 ( $\text{CH}_3$ ), 16.8 ( $\text{CH}_3$ ), 18.3 (C), 26.2 (3 x  $\text{CH}_3$ ), 28.0 ( $\text{CH}_3$ ), 28.6 ( $\text{CH}_2$ ), 32.2 ( $\text{CH}_2$ ), 36.2 ( $\text{CH}$ ), 40.7 ( $\text{CH}$ ), 67.9 ( $\text{CH}_2$ ), 75.8 ( $\text{CH}$ ), 94.1 (C), 144.2 ( $\text{CH}$ ); **LRMS**  $m/z$  (ESI) 449 ( $\text{M}+\text{Na}$ ) $^+$ ; **HRMS**  $m/z$  (ESI) calcd for  $\text{C}_{17}\text{H}_{36}\text{O}_2\text{SiI}$  [ $\text{M}+\text{H}$ ] $^+$ : 427.1524, found 427.1517.

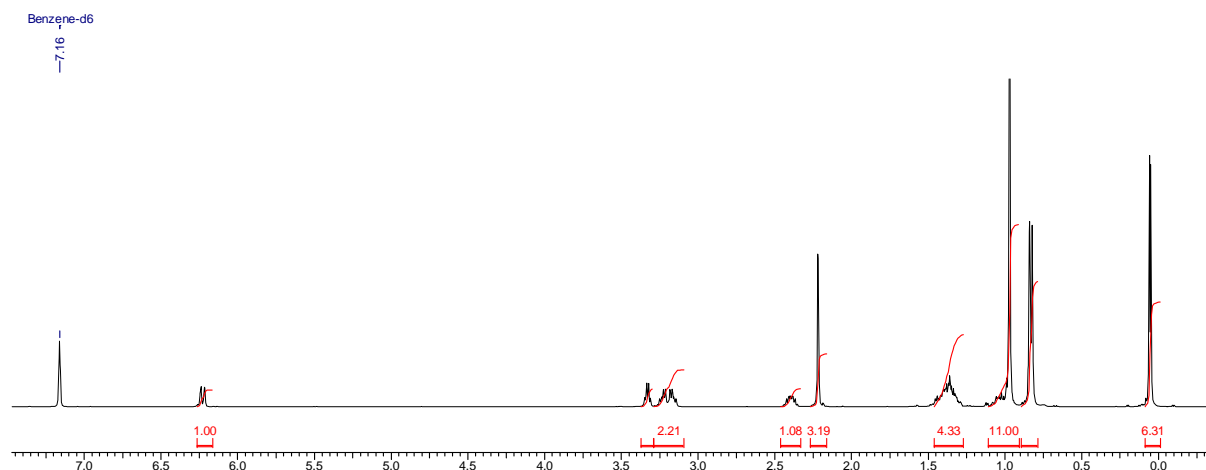

## Supporting Information

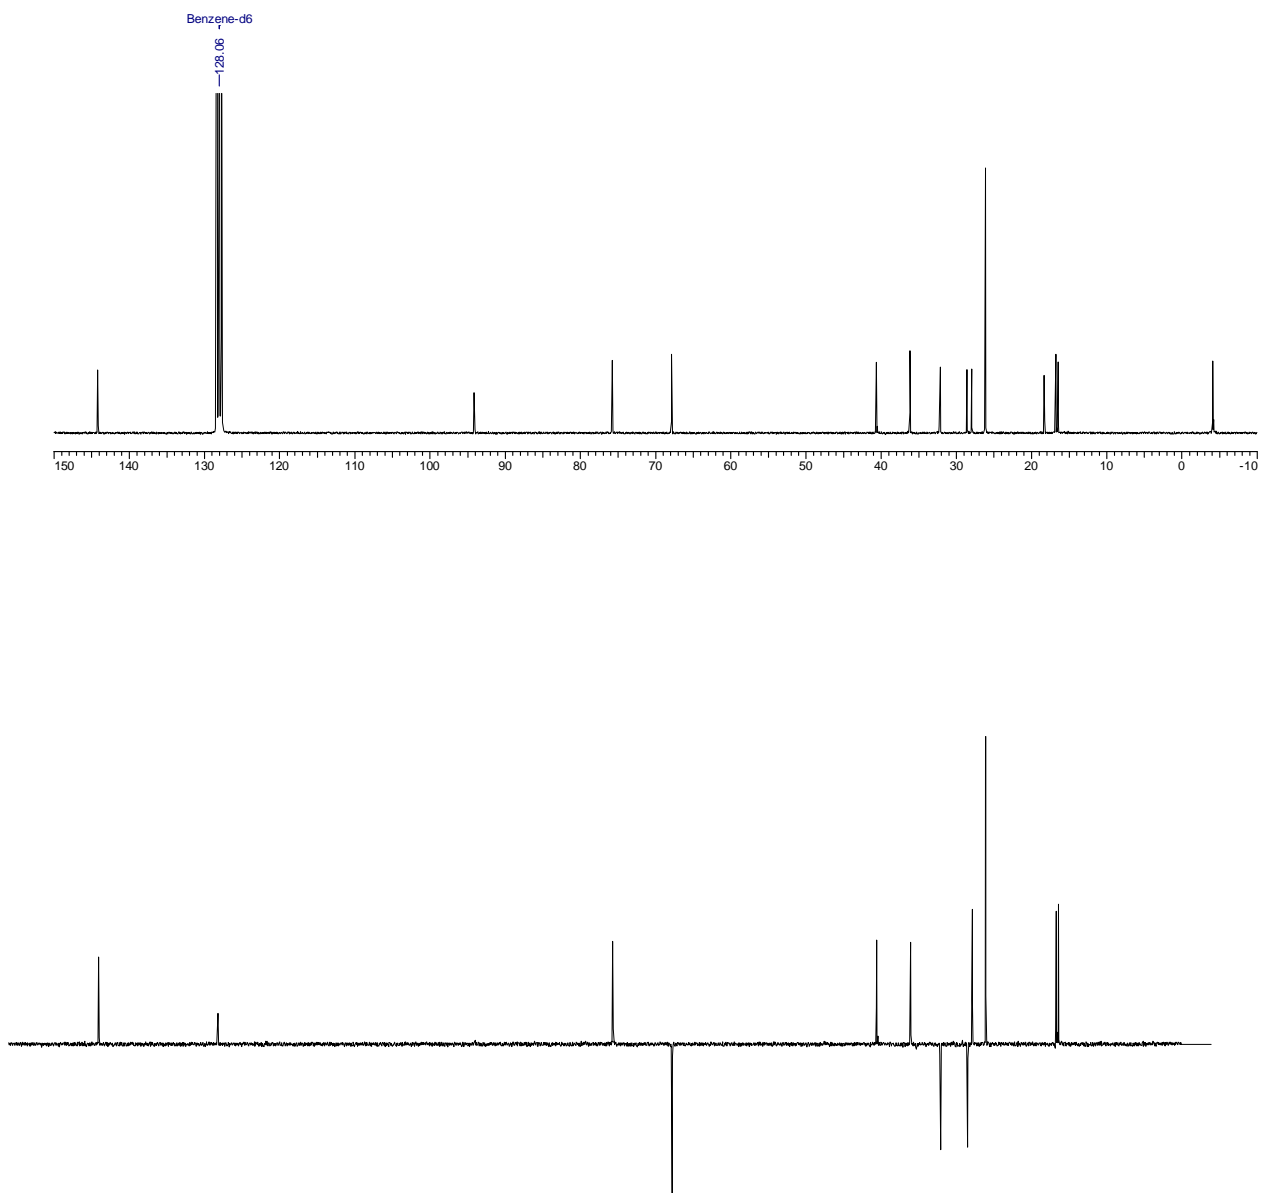

## Supporting Information

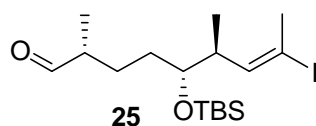

$[\alpha]_D^{28}$  -46.0, (*c* 1.0,  $\text{CHCl}_3$ );  $^1\text{H NMR}$  (300 MHz,  $\text{C}_6\text{D}_6$ )  $\delta$  0.00 (3H, s,  $\text{CH}_3$ ), 0.03 (3H, s,  $\text{CH}_3$ ), 0.77 (3H, d,  $J = 6.9$  Hz,  $\text{CH}_3$ ), 0.78 (3H, d,  $J = 7.1$  Hz,  $\text{CH}_3$ ), 0.94 (9H, s, 3 x  $\text{CH}_3$ ), 1.07-1.16 (1H, m,  $\text{CH}_2$ ), 1.18-1.32 (2H, m,  $\text{CH}_2$ ), 1.41-1.56 (1H, m,  $\text{CH}_2$ ), 1.73-1.84 (1H, m,  $\text{CH}$ ), 2.20 (3H, d,  $J = 1.5$  Hz,  $\text{CH}_3$ ), 2.24-2.41 (1H, m,  $\text{CH}$ ), 3.26 (1H, q,  $J = 5.5$  Hz,  $\text{CH}$ ), 6.14 (1H, br dq,  $J = 10.0$  and 1.5 Hz,  $\text{CH}$ ), 9.30 (1H, d,  $J = 1.3$  Hz,  $\text{CH}$ );  $^{13}\text{C NMR}$  (75 MHz,  $\text{C}_6\text{D}_6$ )  $\delta$  -4.2 ( $\text{CH}_3$ ), -4.1 ( $\text{CH}_3$ ), 13.3 ( $\text{CH}_3$ ), 16.2 ( $\text{CH}_3$ ), 18.3 ( $\text{CH}_3$ ), 25.8 ( $\text{CH}_2$ ), 26.1 (3 x  $\text{CH}_3$ ), 27.9 ( $\text{CH}_3$ ), 31.6 ( $\text{CH}_2$ ), 40.8 ( $\text{CH}$ ), 46.2 ( $\text{CH}$ ), 75.2 ( $\text{CH}$ ), 94.3 (C), 144.0 ( $\text{CH}$ ), 202.9 ( $\text{CH}$ ); **IR** (thin film)  $\nu_{\text{max}} = 2256, 2931, 2858, 1709, 1472, 1464, 1379, 1361, 1254, 1067, 1045, 1027, 1006$   $\text{cm}^{-1}$ ; **LRMS**  $m/z$  (ESI) 447 ( $\text{M}+\text{Na}$ ) $^+$

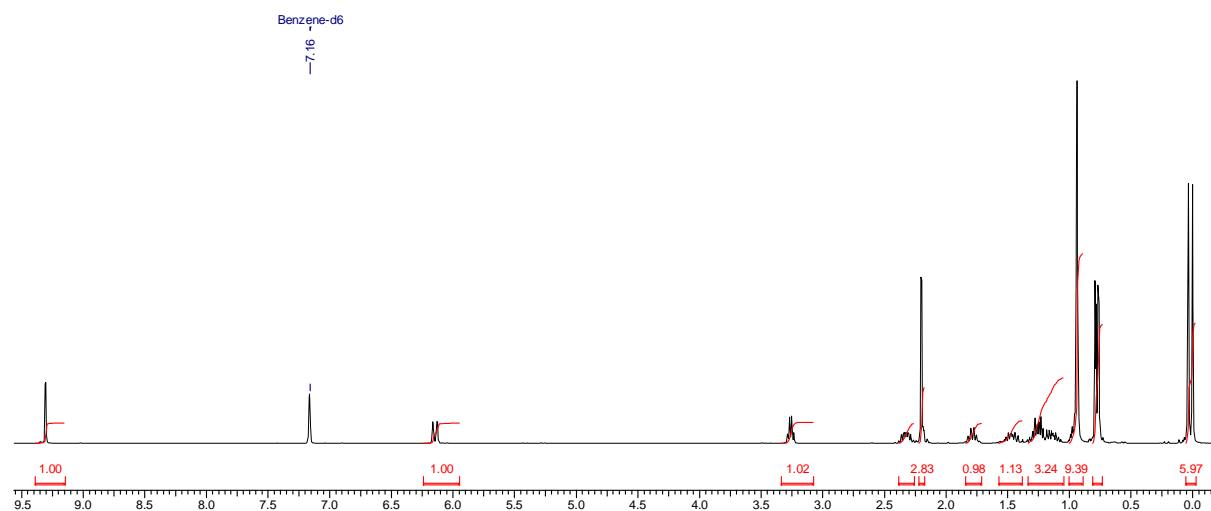

## Supporting Information

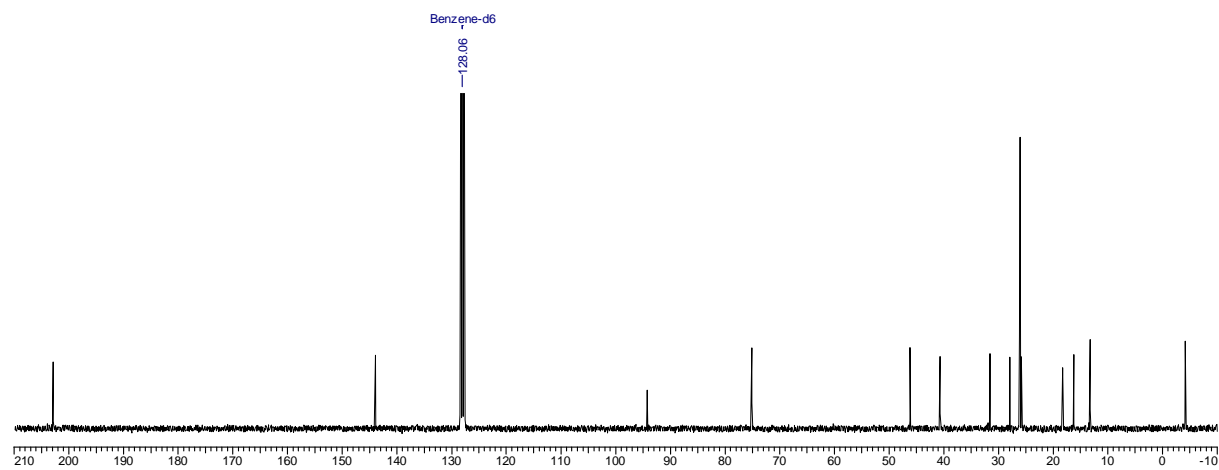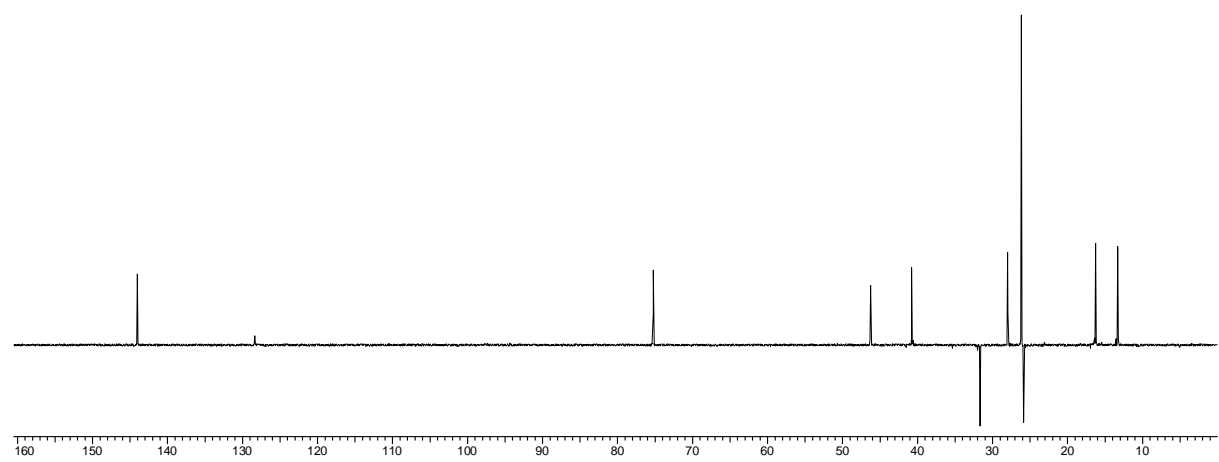

## Supporting Information

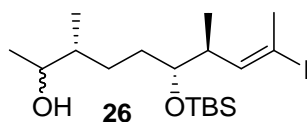

The alcohol is not described because the mixture of diastereomers.

**IR** (thin film)  $\nu_{\max}$  = 3364, 2957, 2928, 2883, 2857, 1471, 1461, 1406, 1378, 1361, 1253, 1065, 1027, 1004, 942  $\text{cm}^{-1}$ ; **LRMS**  $m/z$  (ESI) 463 ( $\text{M}+\text{Na}$ )<sup>+</sup>; **HRMS**  $m/z$  (ESI) calcd for  $\text{C}_{18}\text{H}_{38}\text{O}_2\text{Si}$  [ $\text{M}+\text{H}$ ]<sup>+</sup>: 441.1680, found 441.1667.

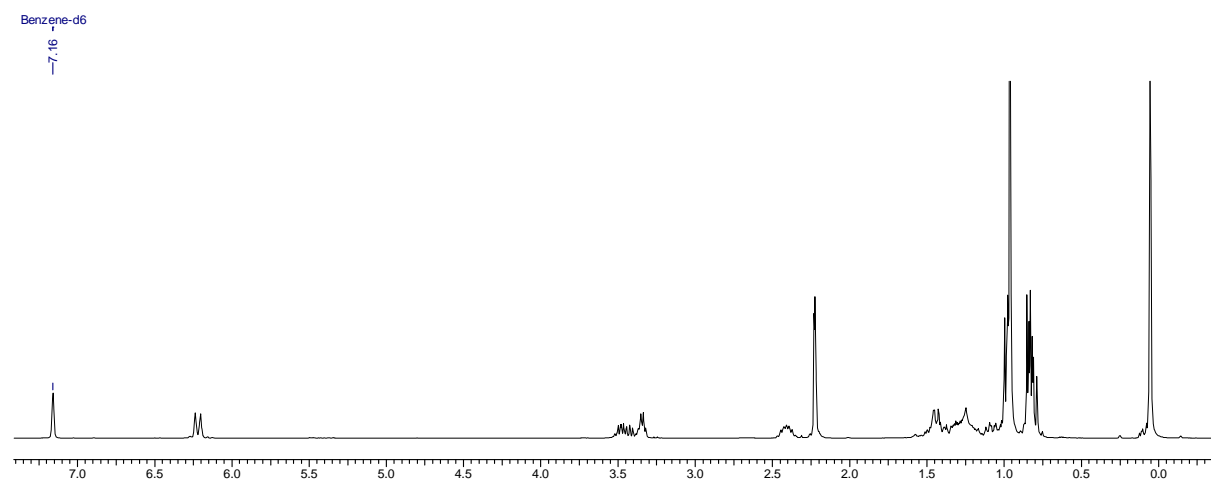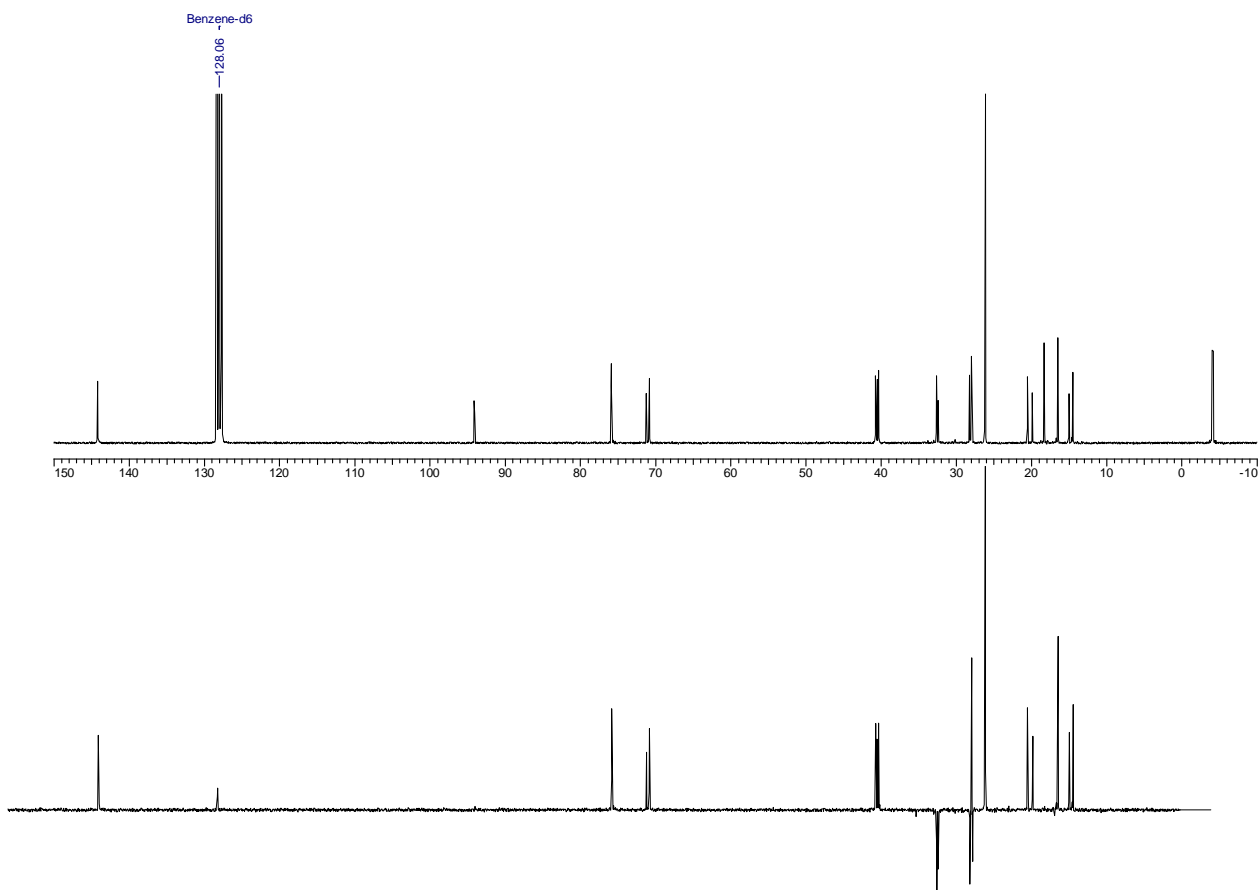

## Supporting Information

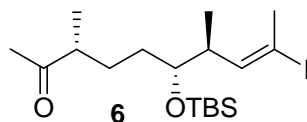

$[\alpha]_D^{36}$  -28.6, (*c* 1.0,  $\text{CHCl}_3$ );  $^1\text{H NMR}$  (300 MHz,  $\text{C}_6\text{D}_6$ )  $\delta$  0.03 (3H, s,  $\text{CH}_3$ ), 0.04 (3H, s,  $\text{CH}_3$ ), 0.79 (3H, d,  $J = 6.8$  Hz,  $\text{CH}_3$ ), 0.87 (3H, d,  $J = 7.0$  Hz,  $\text{CH}_3$ ), 0.95 (9H, s, 3 x  $\text{CH}_3$ ), 1.15-1.38 (3H, m,  $\text{CH}_2$  and  $\text{CH}_2$ ), 1.49-1.59 (1H, m,  $\text{CH}_2$ ), 1.75 (3H, s,  $\text{CH}_3$ ), 2.01-2.10 (1H, m,  $\text{CH}$ ), 2.21 (3H, d,  $J = 1.5$  Hz,  $\text{CH}_3$ ), 2.28-2.40 (1H, m,  $\text{CH}$ ), 3.26-3.31 (1H, m,  $\text{CH}$ ), 6.17 (1H, br dq,  $J = 10.0$  and 1.5 Hz,  $\text{CH}$ );  $^{13}\text{C NMR}$  (75 MHz,  $\text{C}_6\text{D}_6$ )  $\delta$  -4.2 ( $\text{CH}_3$ ), -4.1 ( $\text{CH}_3$ ), 16.3 ( $\text{CH}_3$ ), 16.5 ( $\text{CH}_3$ ), 18.3 (C), 26.2 (3 x  $\text{CH}_3$ ), 27.8 ( $\text{CH}_3$ ), 28.0 ( $\text{CH}_3$ ), 28.3 ( $\text{CH}_2$ ), 32.3 ( $\text{CH}_2$ ), 40.7 (CH), 47.0 (CH), 75.4 (CH), 94.3 (CH), 144.0 (CH), 209.6 (CH); **IR** (thin film)  $\nu_{\text{max}} = 2955, 2929, 2856, 1713, 1471, 1461, 1378, 1359, 1253, 1170, 1067, 1043, 1026, 1006, 940$   $\text{cm}^{-1}$ ; **LRMS**  $m/z$  (ESI) 461 ( $\text{M}+\text{Na}$ ) $^+$ ; **HRMS**  $m/z$  (ESI) calcd for  $\text{C}_{18}\text{H}_{36}\text{O}_2\text{SiI}$   $[\text{M}+\text{H}]^+$ : 439.1524, found 439.1517.

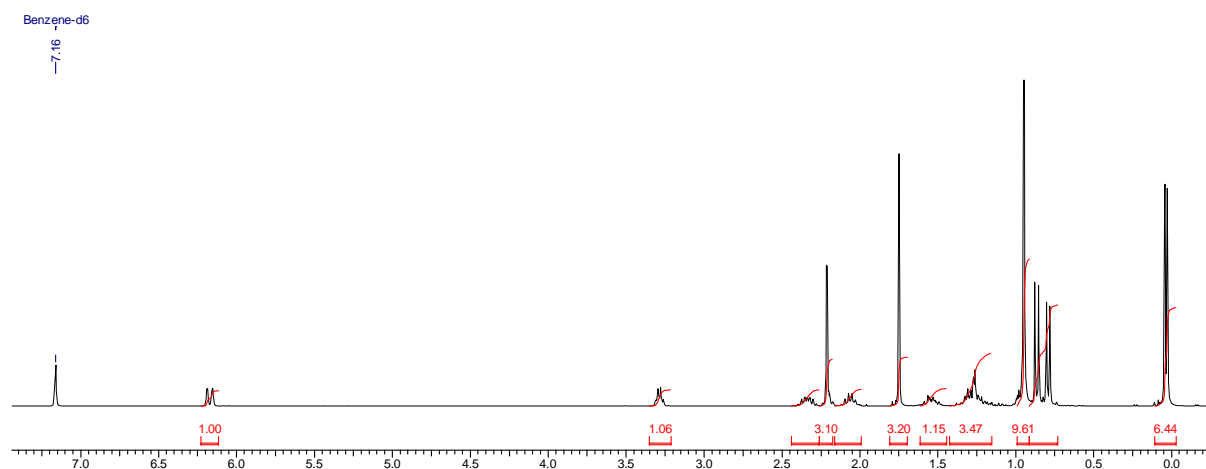

## Supporting Information

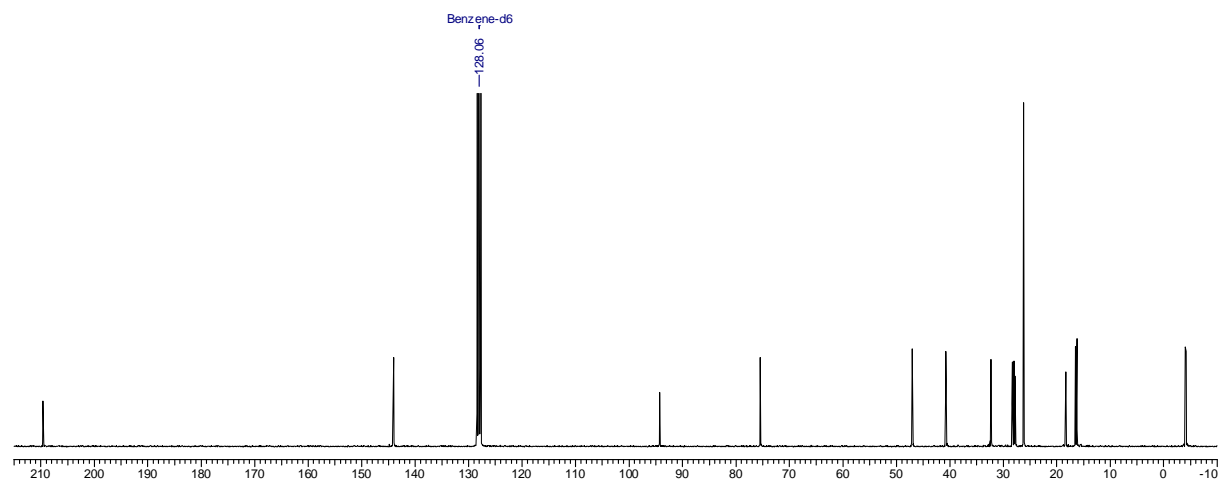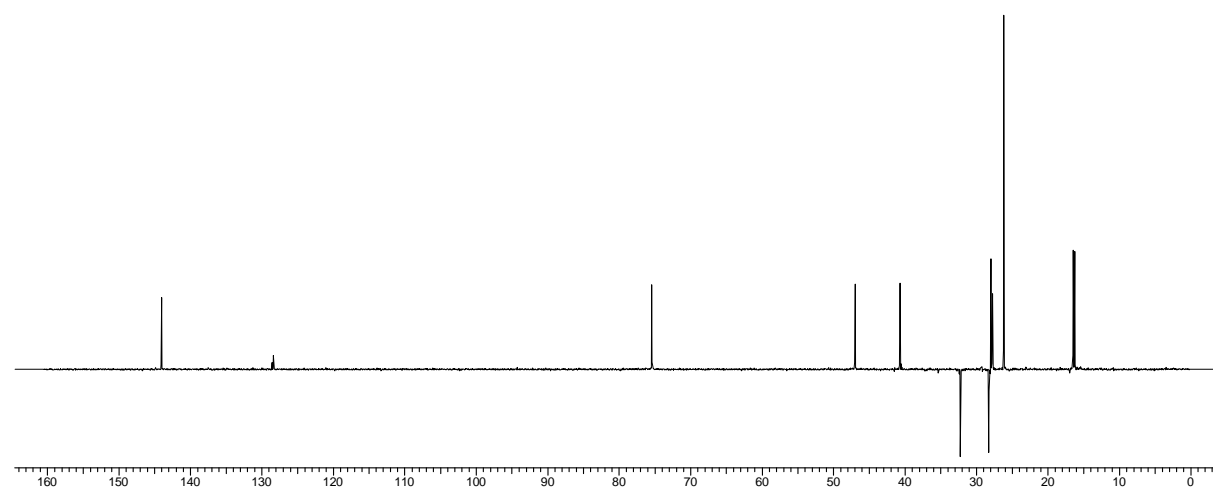

Supplement: c3ob40674a.pdf [file c3ob40674a.pdf]
